# Supplementary material for: Synthesis of pyrazolines by a site isolated resin-bound reagents methodology
Source: Royal Society of Chemistry journal article supplement (doi:10.1039/c004704j), 2010-01-01

# Synthesis of Pyrazolines by a Site Isolated Resin-Bound Reagents Methodology

Vincent Gembus,<sup>a</sup> Jean-Jacques Bonnet,<sup>b</sup> François Janin,<sup>b</sup> Pierre Bohn,<sup>b</sup> Vincent Levacher,<sup>a</sup> and Jean-François Brière<sup>a</sup>

<sup>a</sup>INSA et Université de Rouen, UMR CNRS COBRA, IRCOF (Research Institute in Fine Organic Chemistry), rue Tesnière, BP 08, 76131 Mont Saint Aignan, France.

<sup>b</sup>Faculté de pharmacie de Rouen, Laboratoire de neuropsychopharmacologie expérimentale FRE 2735.

---

|                                                                                               |    |
|-----------------------------------------------------------------------------------------------|----|
| I Various procedures and optimizations .....                                                  | 3  |
| I.1 Optimization of pyrazolines syntheses .....                                               | 3  |
| I.2 Synthesis of enones and aza-Michael product 3b .....                                      | 4  |
| II NMR spectra .....                                                                          | 6  |
| II.1 (E)-N'-benzylidene-N-(3-oxo-2,3-diphenylpropyl)acetohydrazide ( <sup>1</sup> H) 3b ..... | 6  |
| II.1 (E)-N'-benzylidene-N-(3-oxo-2,3-diphenylpropyl)acetohydrazide (JMOD) 3b .....            | 6  |
| II.2 (3,4-diphenyl-4,5-dihydro-1H-pyrazol-1-yl)(phenyl)methanone (1H) 4a .....                | 7  |
| II.2 (3,4-diphenyl-4,5-dihydro-1H-pyrazol-1-yl)(phenyl)methanone (JMOD) 4a .....              | 7  |
| II.3 1-(3,4-diphenyl-4,5-dihydro-1H-pyrazol-1-yl)ethanone (1H) 4b .....                       | 8  |
| II.3 1-(3,4-diphenyl-4,5-dihydro-1H-pyrazol-1-yl)ethanone (JMOD) 4b .....                     | 8  |
| II.4 (3,4-diphenyl-4,5-dihydro-1H-pyrazol-1-yl)(furan-2-yl)methanone (1H) 4c .....            | 9  |
| II.4 (3,4-diphenyl-4,5-dihydro-1H-pyrazol-1-yl)(furan-2-yl)methanone (JMOD) 4c .....          | 9  |
| II.5 benzyl 3,4-diphenyl-4,5-dihydro-1H-pyrazole-1-carboxylate (1H) 4d .....                  | 10 |
| II.5 benzyl 3,4-diphenyl-4,5-dihydro-1H-pyrazole-1-carboxylate (13C) 4d .....                 | 10 |
| II.5 benzyl 3,4-diphenyl-4,5-dihydro-1H-pyrazole-1-carboxylate (JMOD) 4d .....                | 11 |
| II.6 N,3,4-triphenyl-4,5-dihydro-1H-pyrazole-1-carboxamide (1H) 4e .....                      | 12 |
| II.6 N,3,4-triphenyl-4,5-dihydro-1H-pyrazole-1-carboxamide (JMOD) 4e .....                    | 12 |
| II.7 3,4-diphenyl-1-tosyl-4,5-dihydro-1H-pyrazole (1H) 4f .....                               | 13 |
| II.7 3,4-diphenyl-1-tosyl-4,5-dihydro-1H-pyrazole (JMOD) 4f .....                             | 13 |
| II.8 1-(3-(4-chlorophenyl)-4-phenyl-4,5-dihydro-1H-pyrazol-1-yl)ethanone (1H) 4h .....        | 14 |
| II.8 1-(3-(4-chlorophenyl)-4-phenyl-4,5-dihydro-1H-pyrazol-1-yl)ethanone (JMOD) 4h ..         | 14 |
| II.9 3-(4-chlorophenyl)-N,4-diphenyl-4,5-dihydro-1H-pyrazole-1-carboxamide (1H) 4i ...        | 15 |
| II.9 3-(4-chlorophenyl)-N,4-diphenyl-4,5-dihydro-1H-pyrazole-1-carboxamide (JMOD) 4i          | 15 |
| .....                                                                                         | 15 |
| II.10 benzyl 3-(4-chlorophenyl)-4-phenyl-4,5-dihydro-1H-pyrazole-1-carboxylate (1H) 4j        | 16 |
| .....                                                                                         | 16 |
| II.10 benzyl 3-(4-chlorophenyl)-4-phenyl-4,5-dihydro-1H-pyrazole-1-carboxylate (JMOD)         | 16 |
| 4j .....                                                                                      | 16 |
| II.11 1-(3-(4-fluorophenyl)-4-phenyl-4,5-dihydro-1H-pyrazol-1-yl)ethanone (1H) 4k .....       | 17 |
| II.11 VI.11 1-(3-(4-fluorophenyl)-4-phenyl-4,5-dihydro-1H-pyrazol-1-yl)ethanone (JMOD)        | 17 |
| 4k .....                                                                                      | 17 |
| II.12 benzyl 3-(4-fluorophenyl)-4-phenyl-4,5-dihydro-1H-pyrazole-1-carboxylate (1H) 4l        | 18 |
| .....                                                                                         | 18 |

|                                                                                          |    |
|------------------------------------------------------------------------------------------|----|
| II.12 benzyl 3-(4-fluorophenyl)-4-phenyl-4,5-dihydro-1H-pyrazole-1-carboxylate (13C) 4l  | 18 |
| II.12 benzyl 3-(4-fluorophenyl)-4-phenyl-4,5-dihydro-1H-pyrazole-1-carboxylate (JMOD) 4l | 19 |
| II.13 1-(3,4-bis(4-methoxyphenyl)-4,5-dihydro-1H-pyrazol-1-yl)ethanone (1H) 4m           | 20 |
| II.13 1-(3,4-bis(4-methoxyphenyl)-4,5-dihydro-1H-pyrazol-1-yl)ethanone (JMOD) 4m         | 20 |
| II.14 1-(4-phenyl-3-(thiophen-2-yl)-4,5-dihydro-1H-pyrazol-1-yl)ethanone (1H) 4n         | 21 |
| II.14 1-(4-phenyl-3-(thiophen-2-yl)-4,5-dihydro-1H-pyrazol-1-yl)ethanone (JMOD) 4n       | 21 |
| II.15 N,4-diphenyl-3-(thiophen-2-yl)-4,5-dihydro-1H-pyrazole-1-carboxamide (1H) 4o       | 22 |
| II.15 N,4-diphenyl-3-(thiophen-2-yl)-4,5-dihydro-1H-pyrazole-1-carboxamide (JMOD) 4o     | 22 |
| II.16 1-(4-methyl-3-phenyl-4,5-dihydro-1H-pyrazol-1-yl)ethanone (1H) 4p                  | 23 |
| II.16 1-(4-methyl-3-phenyl-4,5-dihydro-1H-pyrazol-1-yl)ethanone (JMOD) 4p                | 23 |
| II.17 (3-isopropyl-4-phenyl-4,5-dihydro-1H-pyrazol-1-yl)(phenyl)methanone (1H) 4q        | 24 |
| II.17 (3-isopropyl-4-phenyl-4,5-dihydro-1H-pyrazol-1-yl)(phenyl)methanone (JMOD) 4q      | 24 |
| II.18 3-isopropyl-N,4-diphenyl-4,5-dihydro-1H-pyrazole-1-carboxamide (1H) 4r             | 25 |
| II.18 3-isopropyl-N,4-diphenyl-4,5-dihydro-1H-pyrazole-1-carboxamide (JMOD) 4r           | 25 |
| II.19 1-(methylsulfonyl)-3,4-diphenyl-4,5-dihydro-1H-pyrazole (1H) 4s                    | 26 |
| II.19 1-(methylsulfonyl)-3,4-diphenyl-4,5-dihydro-1H-pyrazole (JMOD) 4s                  | 26 |
| II.20 N-cyclohexyl-3,4-diphenyl-4,5-dihydro-1H-pyrazole-1-carboxamide (1H) 4t            | 27 |
| II.20 N-cyclohexyl-3,4-diphenyl-4,5-dihydro-1H-pyrazole-1-carboxamide (13C) 4t           | 27 |

---

## I Various procedures and optimizations

### I.1 Optimization of pyrazolines syntheses

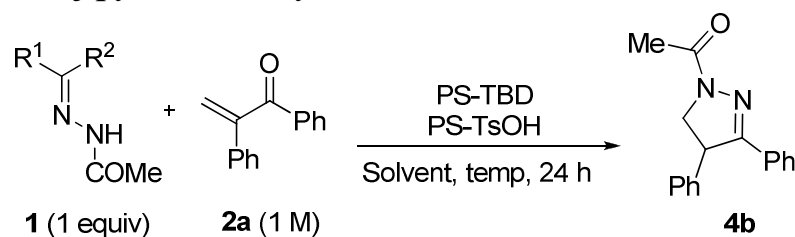

| Entry | Hydrazone <b>1</b><br>R <sup>1</sup> , R <sup>2</sup> (equiv) | Solvent           | Temp<br>(°C) | PS-TBD<br>(%) | PS-TsOH<br>(%) | Pyrazoline<br><b>4b</b> <sup>a</sup> (%) | Enone<br><b>2a</b> <sup>a</sup> (%) |
|-------|---------------------------------------------------------------|-------------------|--------------|---------------|----------------|------------------------------------------|-------------------------------------|
| 1     | Me, H (1.2)                                                   | THF               | 50           | 20            | 100            | 9                                        | 39                                  |
| 2     | Me, H (1.2)                                                   | MeCN              | 50           | 20            | 100            | 40                                       | 16                                  |
| 3     | Me, H (1.2)                                                   | DMF               | 50           | 20            | 100            | 50                                       | 4                                   |
| 4     | Me, H (1.2)                                                   | MeCN              | 25           | 20            | 100            | 20                                       | 29                                  |
| 5     | Me, H (1.5)                                                   | MeCN              | 50           | 20            | 100            | 55                                       | 10                                  |
| 6     | Me, H (1.5)                                                   | DMF               | 50           | 20            | 100            | 59                                       | 2                                   |
| 7     | Me, H (1.5)                                                   | MeCN              | 50           | 20            | 40             | 33 <sup>b</sup>                          | 6                                   |
| 8     | Me, H (1.5)                                                   | MeCN              | 50           | 20            | 10             | - <sup>c</sup>                           | 6                                   |
| 9     | Et, H (1.5)                                                   | MeCN              | 50           | 20            | 100            | 62                                       | 8                                   |
| 10    | Me, Me (1.5)                                                  | MeCN              | 50           | 20            | 100            | 52                                       | 18                                  |
| 11    | Ph, H (1.5)                                                   | MeCN              | 50           | 20            | 100            | 73                                       | 2                                   |
| 12    | 4-MeOC <sub>6</sub> H <sub>4</sub> , H (1.5)                  | MeCN              | 50           | 20            | 100            | 78                                       | 1                                   |
| 13    | 4-MeOC <sub>6</sub> H <sub>4</sub> , H (1.5)                  | MeCN <sup>d</sup> | 50           | 20            | 100            | 51                                       | 26                                  |
| 14    | 4-MeOC <sub>6</sub> H <sub>4</sub> , H (1.5)                  | MeCN              | 50           | 40            | 100            | 69                                       | 1                                   |
| 15    | 4-MeOC <sub>6</sub> H <sub>4</sub> , H (1.5)                  | MeCN              | 50           | 10            | 100            | 77                                       | 1                                   |

<sup>a</sup> Yield determined by <sup>1</sup>H NMR of the crude product by an internal standard. <sup>b</sup> 27% of aza-Michael product **3** was obtained. <sup>c</sup> 59% of aza-Michael product **3** was obtained. <sup>d</sup> 1 equivalent of H<sub>2</sub>O.

Remark: in optimized conditions the hydrazones could be recovered.

## 1.2 Synthesis of enones and aza-Michael product 3b

**Representative standard procedures for the synthesis of enones (adapted from the literature).<sup>1</sup> Method A – for 1,2-diarylprop-2-en-1-ones synthesis.** To a stirred solution of deoxybenzoin (1.96 g, 10 mmol) in MeOH (25 mL) was successively added formaline (3.57 mL: 37% aqueous solution), piperidine (0.128 mL, 1.3 mmol) and AcOH (0.128 mL, 2.2 mmol). The resulting mixture was refluxed for 3 h and concentrated *in vacuo*. Water was added and the obtained mixture was extracted with CH<sub>2</sub>Cl<sub>2</sub>. The combined organic layers were washed with water, dried over MgSO<sub>4</sub>, filtered and concentrated *in vacuo* to give 1,2-diphenylprop-2-en-1-one as colorless oil (2.08 g, quantitative crude yield). The rather unstable crude product was used rapidly without further purification. The analytical data are in accordance with literatures. **Method B – for 1- or 2-monoarylprop-2-en-1-ones synthesis.** To a stirred solution of propiophenone (1.34 g, 10 mmol) in DMF (25 mL) was successively added paraformaldehyde (1.5 g), piperidine (0.128 mL, 1.3 mmol) and AcOH (0.128 mL, 2.2 mmol). The resulting mixture was heating at 90 °C for 1 h. After cooling, water was added to the residue and the mixture was extracted with Et<sub>2</sub>O. The combined organic layers were washed with water, dried over MgSO<sub>4</sub>, filtered, and concentrated to give *in vacuo* 2-methyl-1-phenylprop-2-en-1-one as colorless oil (1.46 g, quantitative yield). The rather unstable crude product was used rapidly without further purification. The analytical data are in accordance with literatures.

### Analysis data of unknown enone 2

**1,2-bis(4-methoxyphenyl)prop-2-en-1-one (Table 3, entry 13).** Pale yellow oil;  $\delta_{\text{H}}$ (300 MHz; CDCl<sub>3</sub>) 7.94-7.89 (2 H, m), 7.36-7.32 (2 H, m), 6.91-6.84 (4 H, m), 5.89 (1 H, s), 5.44 (1 H, s), 3.84 (3 H, s), 3.79 (3 H, s);  $\delta_{\text{C}}$ (75.4 MHz; CDCl<sub>3</sub>) 196.7 (C), 163.7 (C), 159.8 (C), 147.9 (C), 132.5 (CH), 129.9 (C), 129.7 (C), 128.1 (CH), 117.1 (CH<sub>2</sub>), 114.1 (CH), 113.7 (CH), 55.5 (CH<sub>3</sub>), 55.3 (CH<sub>3</sub>); MS (EI) m/z : 268, 240, 225, 209, 165, 135, 118, 107, 92, 77.

**4-methyl-2-phenylpent-1-en-3-one (Table 3, entries 17-18).** Colorless oil;  $\delta_{\text{H}}$ (300 MHz; CDCl<sub>3</sub>) 7.27-7.18 (5 H, m), 5.89 (1 H, s), 5.75 (1 H, s), 3.20-3.06 (1 H, m), 1.05 (3 H, d, *J* 6.9);  $\delta_{\text{C}}$ (75.4 MHz; CDCl<sub>3</sub>) 207.0 (C), 149.1 (C), 137.5 (C), 128.3 (CH), 128.2 (CH), 128.1 (CH), 122.7 (CH<sub>2</sub>), 36.8 (CH), 18.8 (CH<sub>3</sub>); MS (EI) m/z : 174, 159, 131, 115, 103, 91, 77.

### Analysis data for aza-Michael product (Table 1, entry 8).

**(E)-N'-benzylidene-N-(3-oxo-2,3-diphenylpropyl)acetohydrazide (3b).** White solid (150.0 mg, 81 %); *R<sub>f</sub>* = 0.46 (Petroleum ether/EtOAc: 2/1); mp 126-128 °C; IR (KBr)  $\nu_{\text{max}}/\text{cm}^{-1}$  1672, 1612, 1596, 1578, 1493, 1440, 1408, 1359, 1215, 1146, 1036, 975, 749,

---

<sup>1</sup> (a) A. C. Arnold, C. Grosscurt, R. van Hes and K. Wellinga, *J. Agric. Food Chem.*, 1979, **27**, 406; (b) J. H. M. Lange, H. K. A. C. Coolen, H. H. van Stuivenberg, J. A. R. Dijkman, A. H. J. Herremans, E. Ronken, H. G. Keizer, K. Tipker, A. C. McCreary, W. Veerman, H. C. Wals, B. Stork, P. C. Verveer, A. P. den Hartog, N. M. J. de Jong, T. J. P. Adolfs, J. Hoogendoorn and C. G. Kruse, *J. Med. Chem.*, 2004, **47**, 627; (c) J. A. R. Rodrigues, E. P. Siqueira-Filho, M. de Mancilha and P. J. S. Moran, *Synth. Commun.*, 2003, **33**, 331.



702;  $\delta_{\text{H}}$ (300 MHz;  $\text{CDCl}_3$ ) 7.94-7.91 (2 H, m), 7.56-7.17 (14 H, m), 5.16 (1 H, t,  $J$  7.7), 4.61 (1 H, dd,  $J$  14.5 and  $J$  6.2), 4.38 (1 H, dd,  $J$  14.5 and  $J$  7.9), 2.42 (3 H, s);  $\delta_{\text{C}}$ (75.4 MHz;  $\text{CDCl}_3$ ) 198.6 (C), 173.7 (C), 139.6 (CH), 137.1 (C), 136.1 (C), 134.7 (C), 133.3 (CH), 129.7 (CH), 129.3 (CH), 129.0 (CH), 128.7 (CH), 128.6 (CH), 128.4 (CH), 128.0 (CH), 127.0 (CH), 51.0 (CH), 44.2 ( $\text{CH}_2$ ), 22.1 ( $\text{CH}_3$ ); HRMS (ESI+): Calcd for  $\text{C}_{24}\text{H}_{23}\text{N}_2\text{O}_2$   $[\text{M}+\text{H}]^+$ : 371.1760; Found: 371.1767.

## II NMR spectra

### II.1 (*E*)-*N'*-benzylidene-*N*-(3-oxo-2,3-diphenylpropyl)acetohydrazide (<sup>1</sup>H) 3b

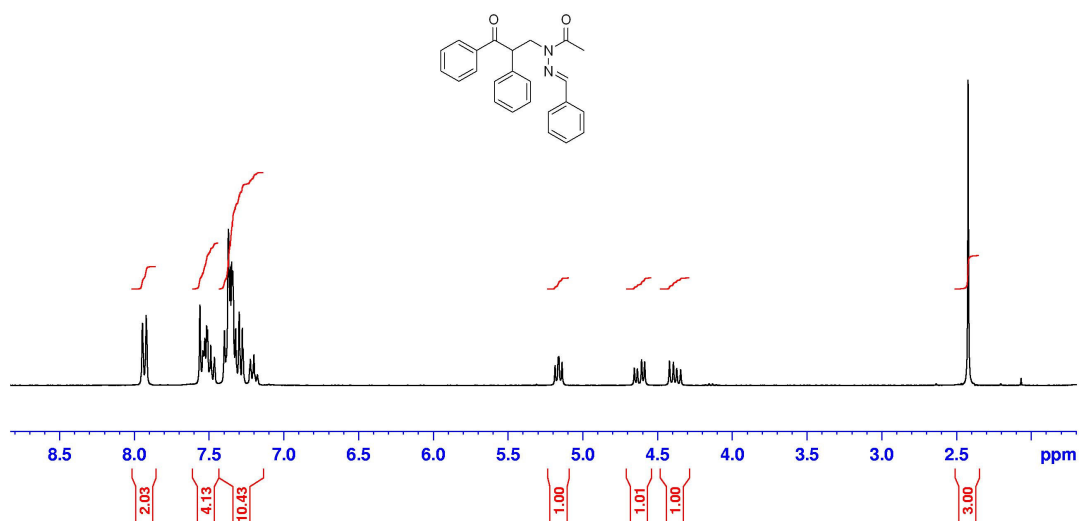

### II.1 (*E*)-*N'*-benzylidene-*N*-(3-oxo-2,3-diphenylpropyl)acetohydrazide (JMOD) 3b

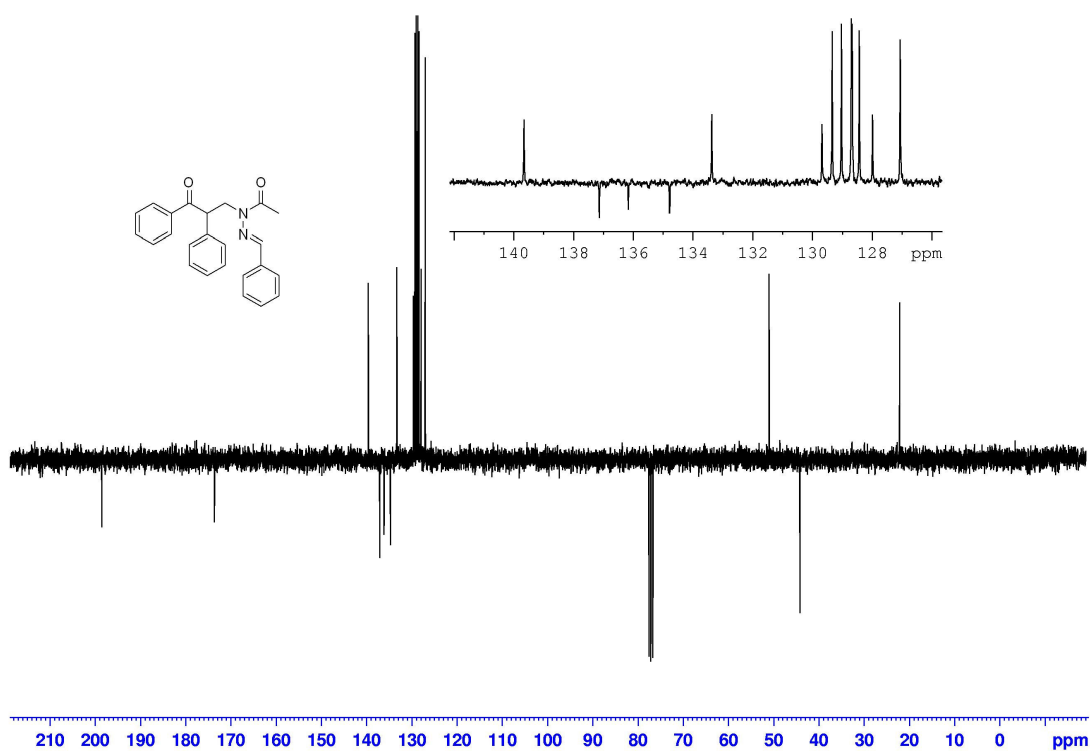

**II.2 (3,4-diphenyl-4,5-dihydro-1H-pyrazol-1-yl)(phenyl)methanone (1H) 4a**

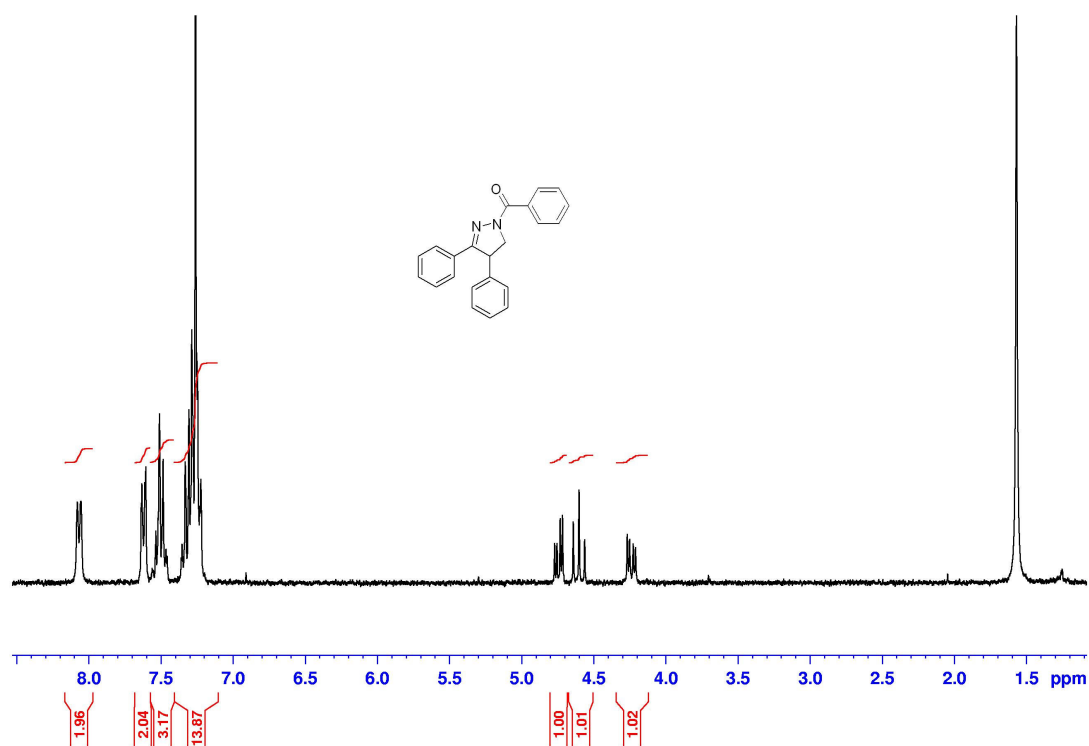

**II.2 (3,4-diphenyl-4,5-dihydro-1H-pyrazol-1-yl)(phenyl)methanone (JMOD) 4a**

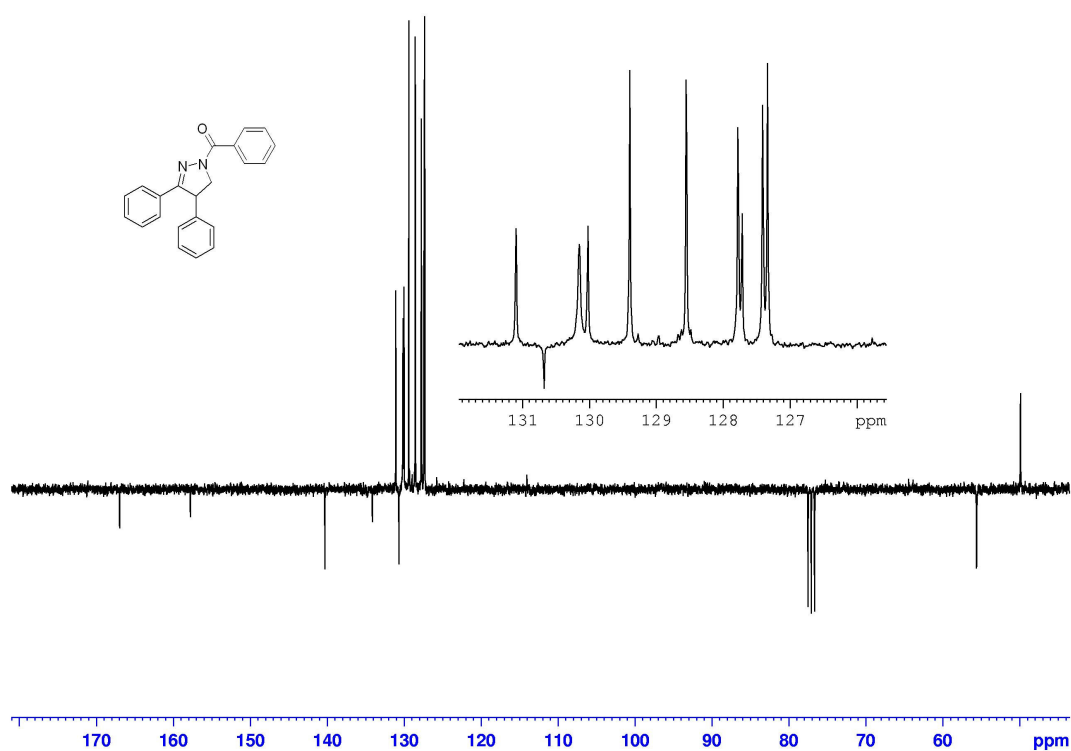

**II.3 1-(3,4-diphenyl-4,5-dihydro-1H-pyrazol-1-yl)ethanone (1H) 4b**

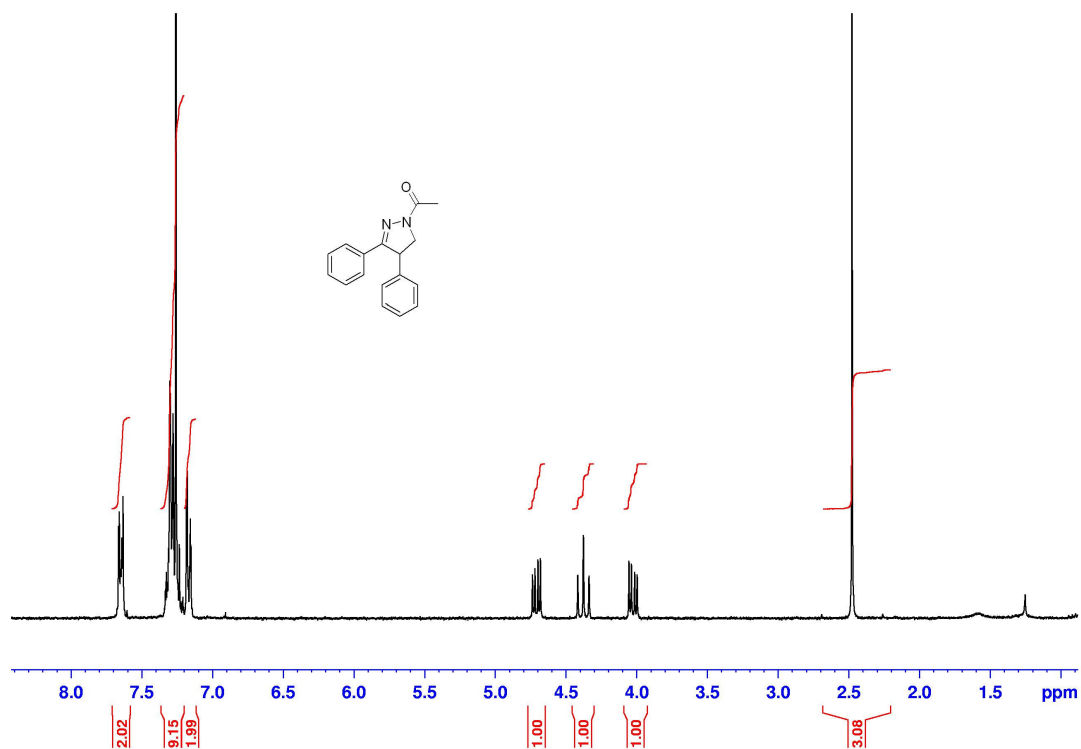

**II.3 1-(3,4-diphenyl-4,5-dihydro-1H-pyrazol-1-yl)ethanone (JMOD) 4b**

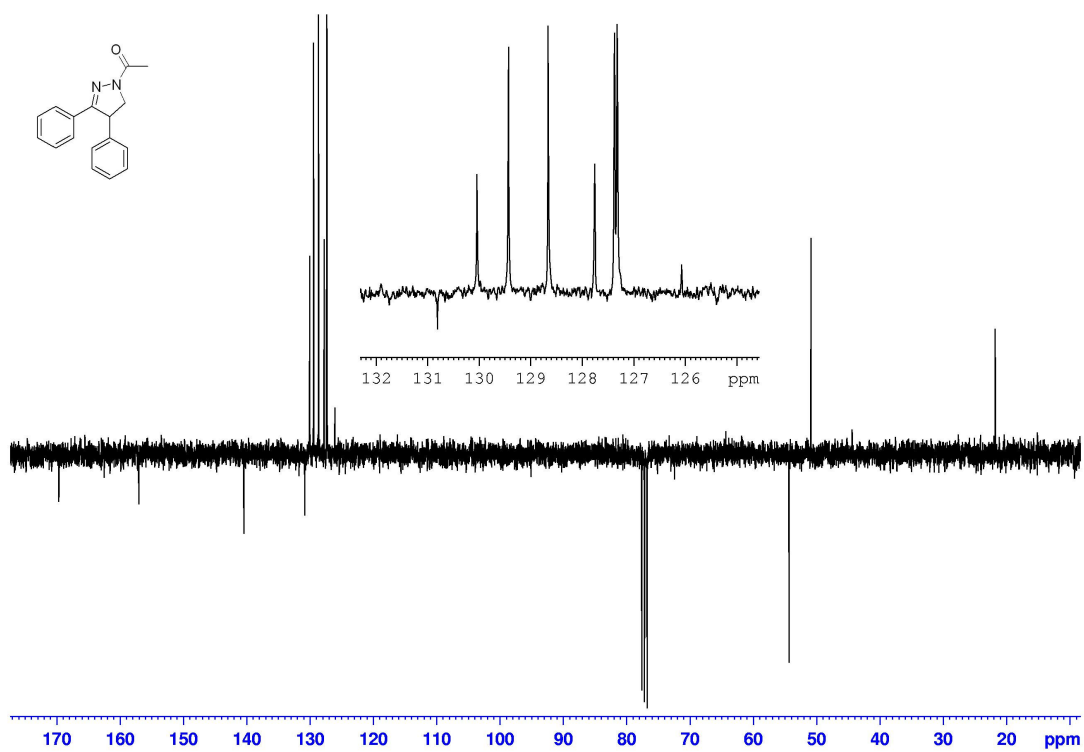

**II.4 (3,4-diphenyl-4,5-dihydro-1H-pyrazol-1-yl)(furan-2-yl)methanone (1H) 4c**

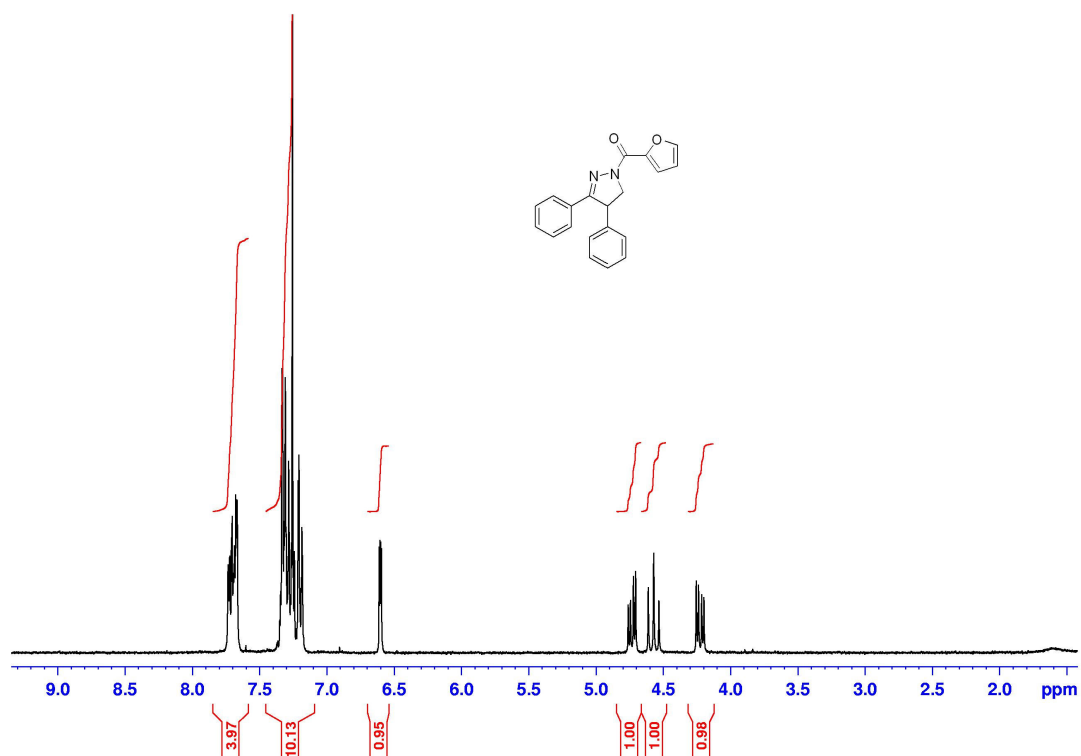

**II.4 (3,4-diphenyl-4,5-dihydro-1H-pyrazol-1-yl)(furan-2-yl)methanone (JMOD) 4c**

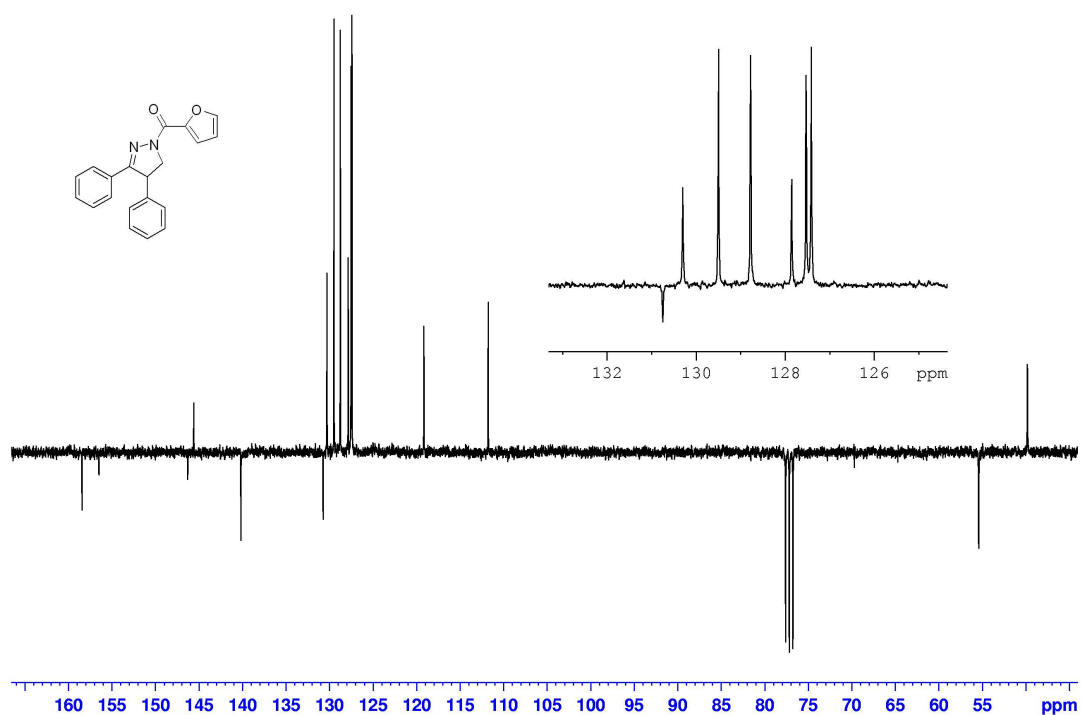

### ***II.5 benzyl 3,4-diphenyl-4,5-dihydro-1H-pyrazole-1-carboxylate (1H) 4d***

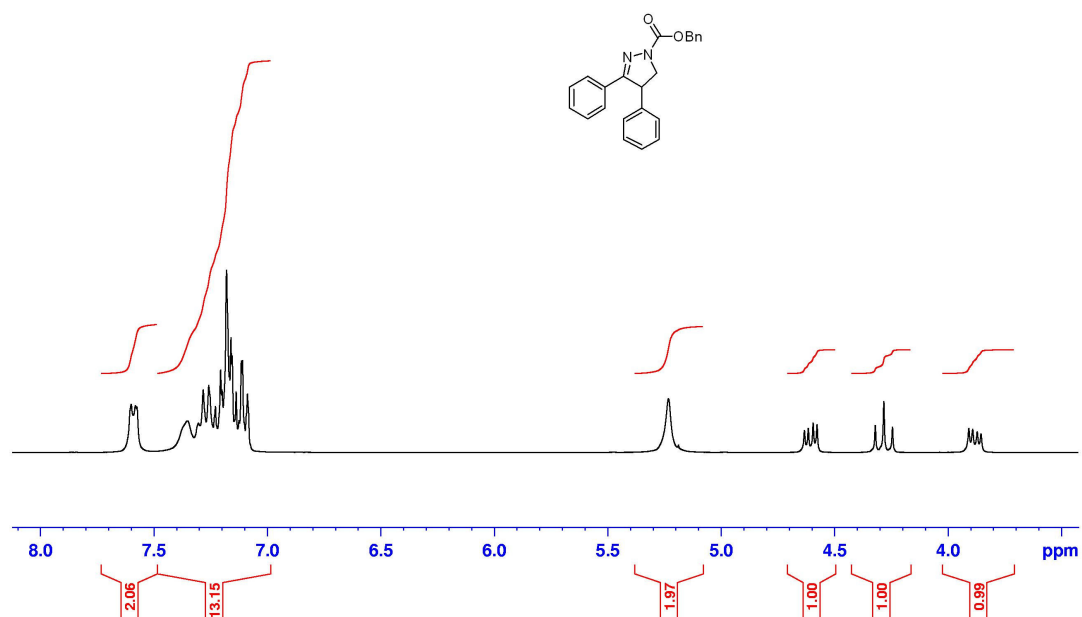

### ***II.5 benzyl 3,4-diphenyl-4,5-dihydro-1H-pyrazole-1-carboxylate (13C) 4d***

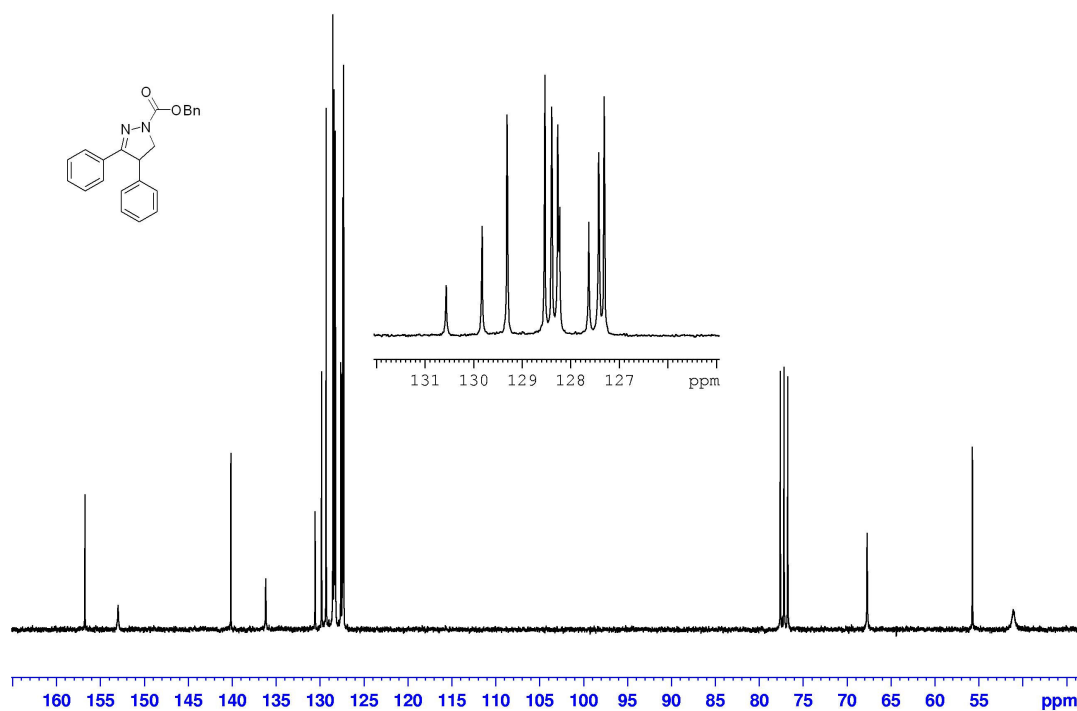

Remark: the peak corresponding to carbon 3 (CH) appeared as a small broad signal due to relaxation issue in pyrazoline-NCbz series.

***II.5 benzyl 3,4-diphenyl-4,5-dihydro-1H-pyrazole-1-carboxylate (JMOD) 4d***

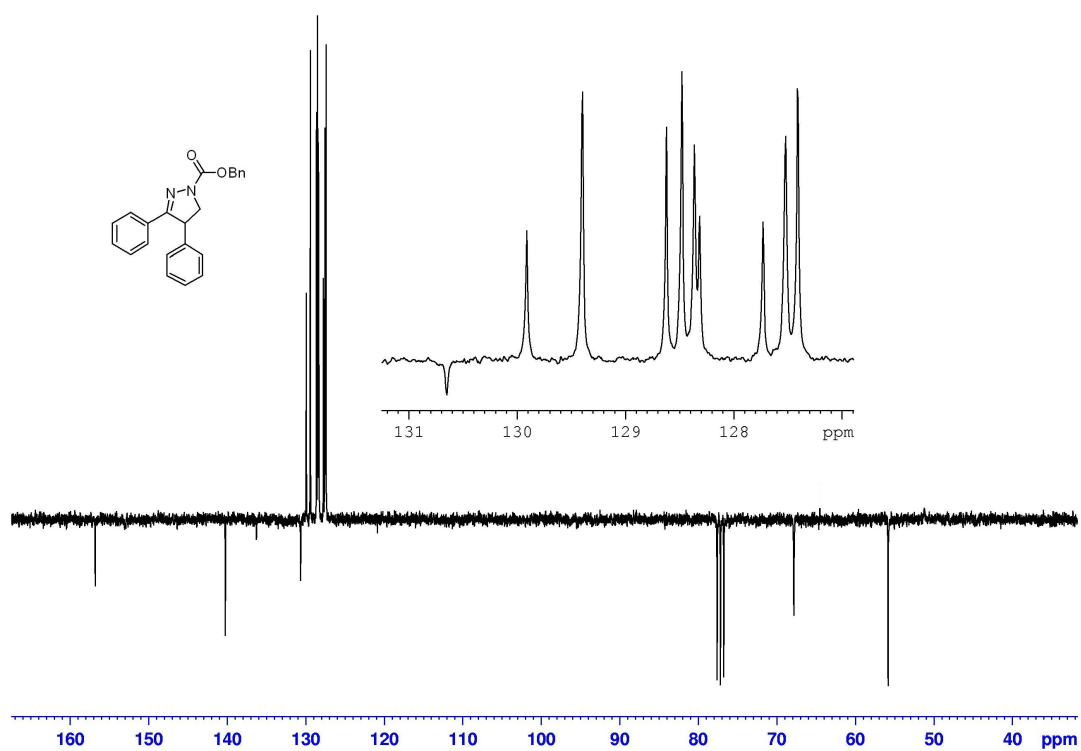

**II.6 *N*,3,4-triphenyl-4,5-dihydro-1*H*-pyrazole-1-carboxamide (1*H*) 4e**

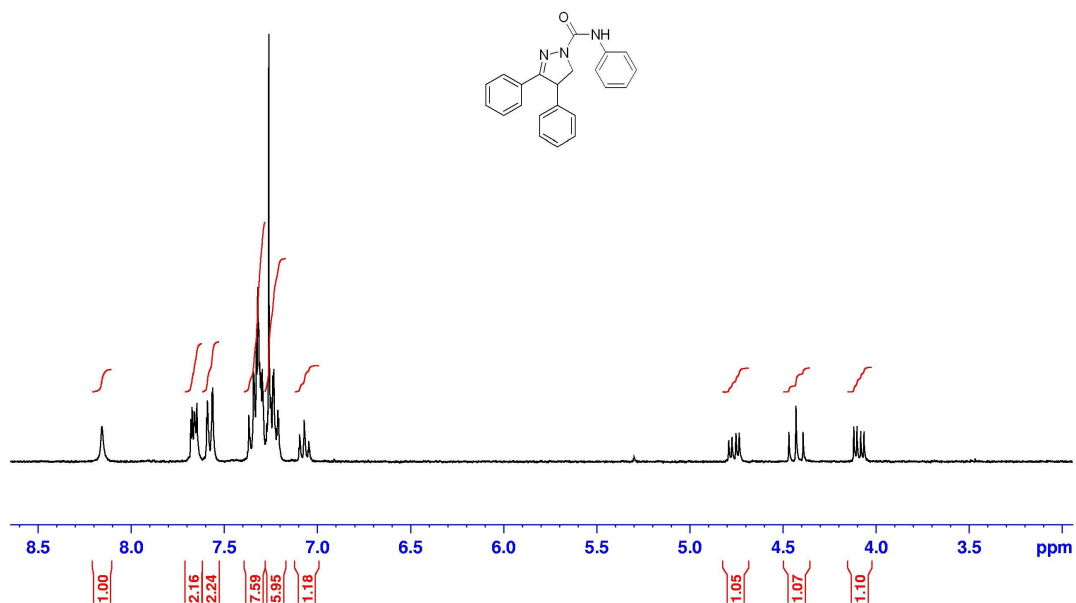

**II.6 *N*,3,4-triphenyl-4,5-dihydro-1*H*-pyrazole-1-carboxamide (JMOL) 4e**

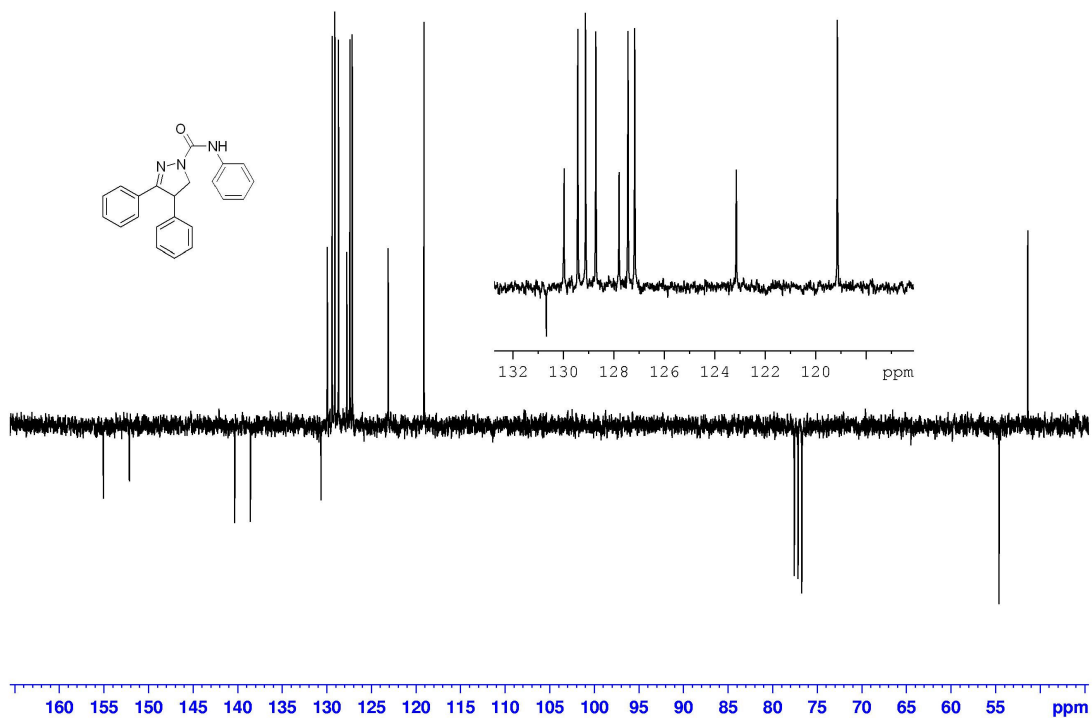



### II.7 3,4-diphenyl-1-tosyl-4,5-dihydro-1H-pyrazole (1H) 4f

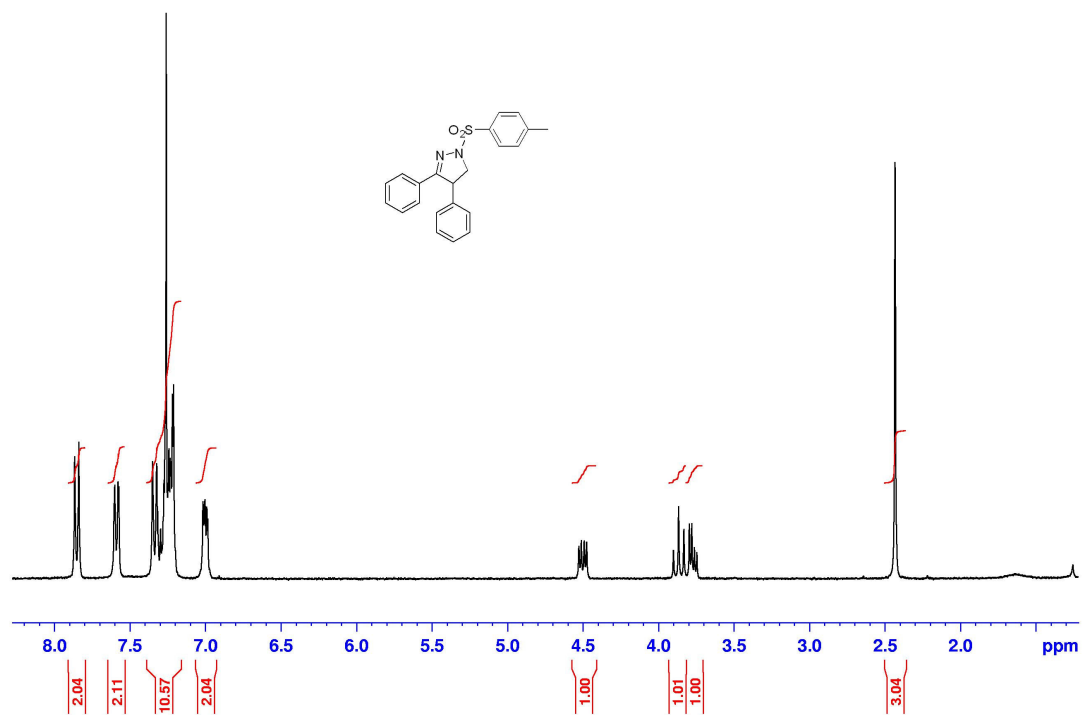

### II.7 3,4-diphenyl-1-tosyl-4,5-dihydro-1H-pyrazole (JMOD) 4f

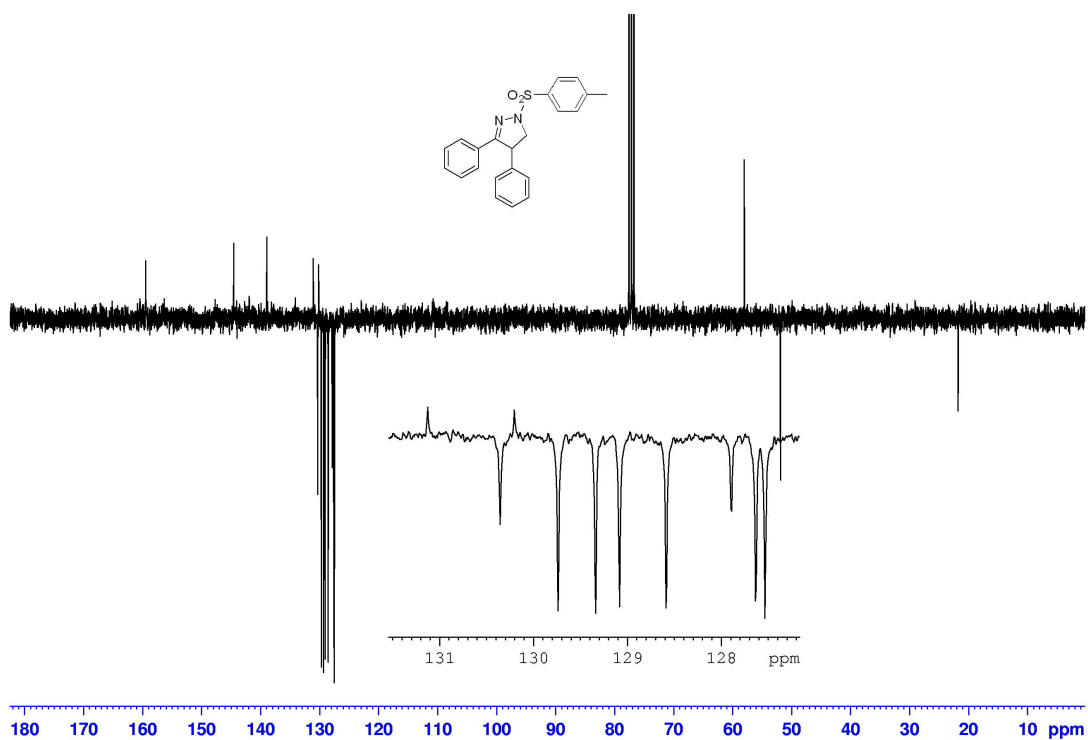

**II.8** *1-(3-(4-chlorophenyl)-4-phenyl-4,5-dihydro-1H-pyrazol-1-yl)ethanone*  
**(1H) 4h**

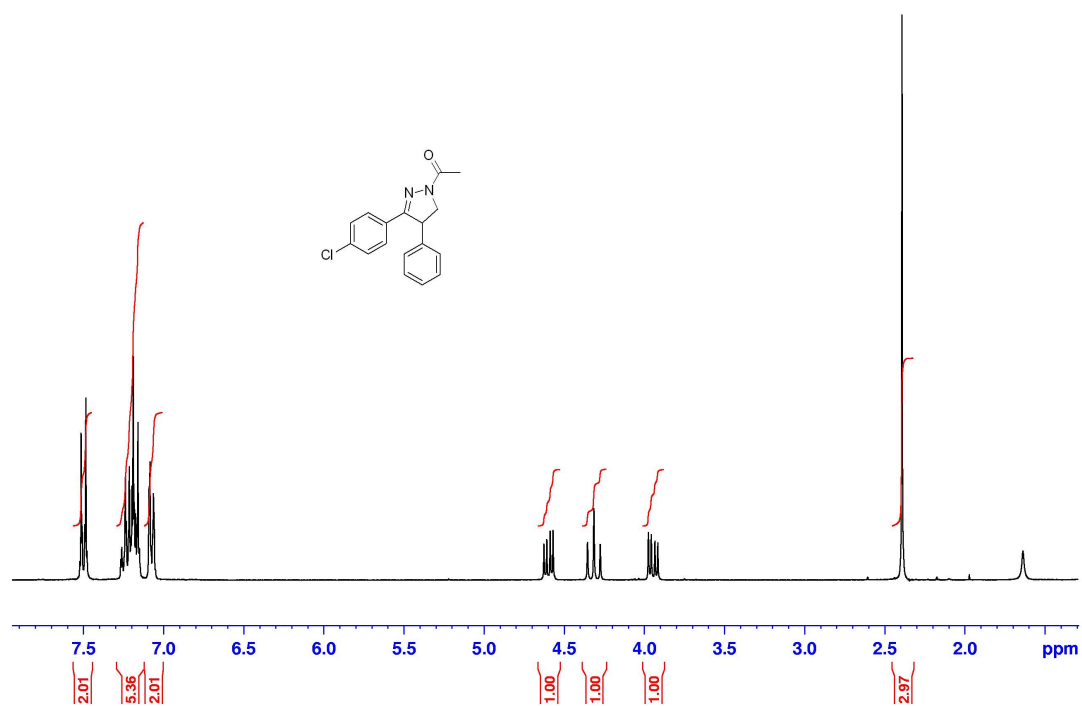

**II.8** *1-(3-(4-chlorophenyl)-4-phenyl-4,5-dihydro-1H-pyrazol-1-yl)ethanone*  
**(JMOD) 4h**

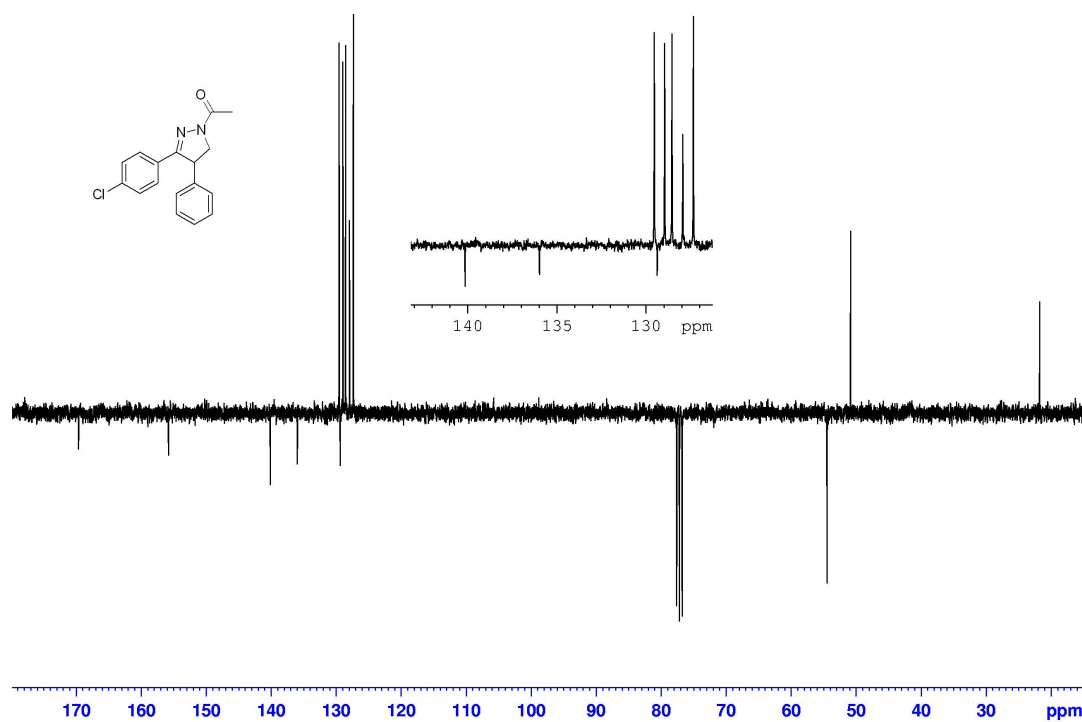

**II.9 3-(4-chlorophenyl)-N,4-diphenyl-4,5-dihydro-1H-pyrazole-1-carboxamide (1H) 4i**

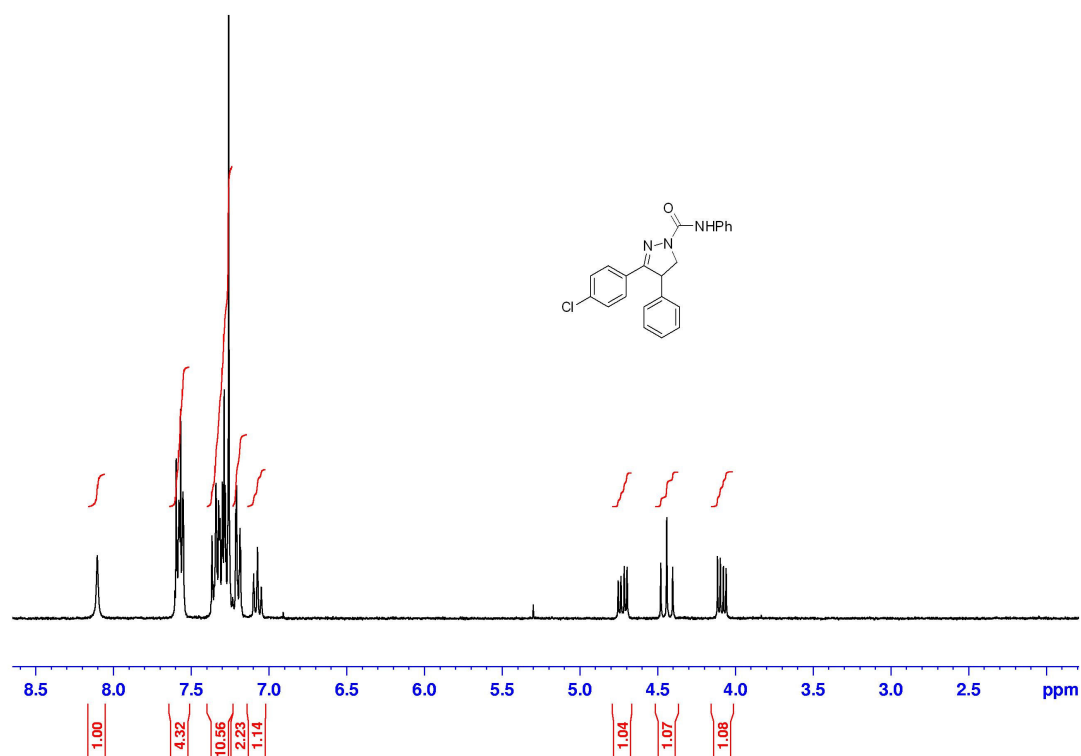

**II.9 3-(4-chlorophenyl)-N,4-diphenyl-4,5-dihydro-1H-pyrazole-1-carboxamide (JMOD) 4i**

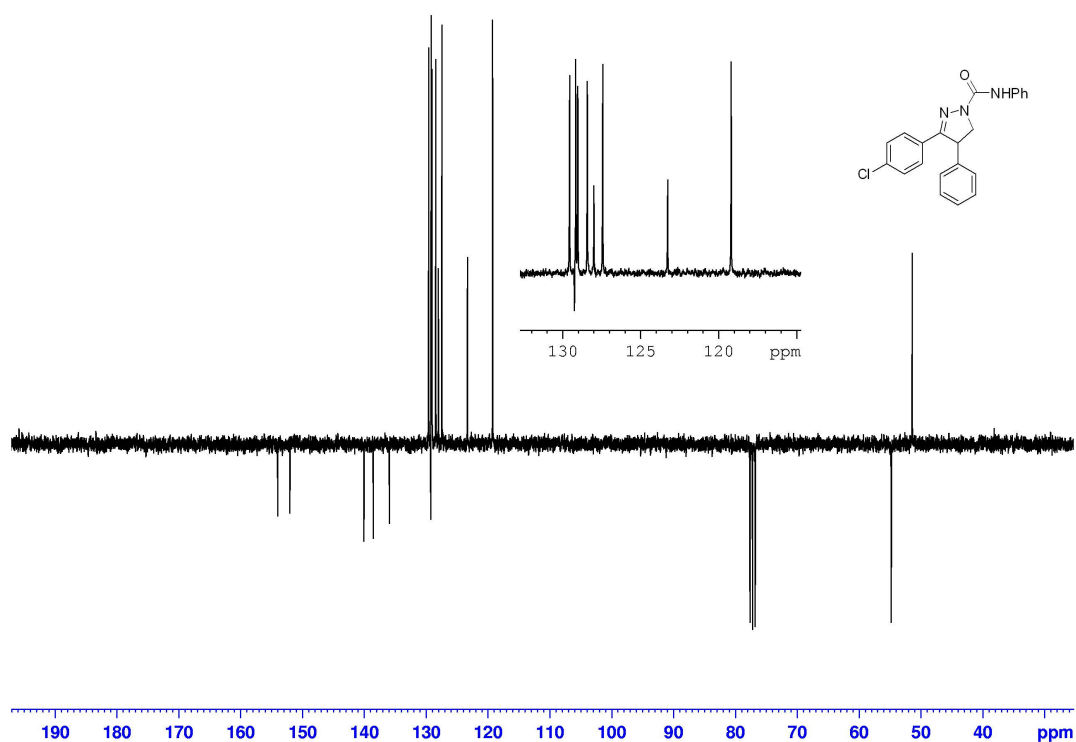

**II.10** *benzyl 3-(4-chlorophenyl)-4-phenyl-4,5-dihydro-1H-pyrazole-1-carboxylate (1H) 4j*

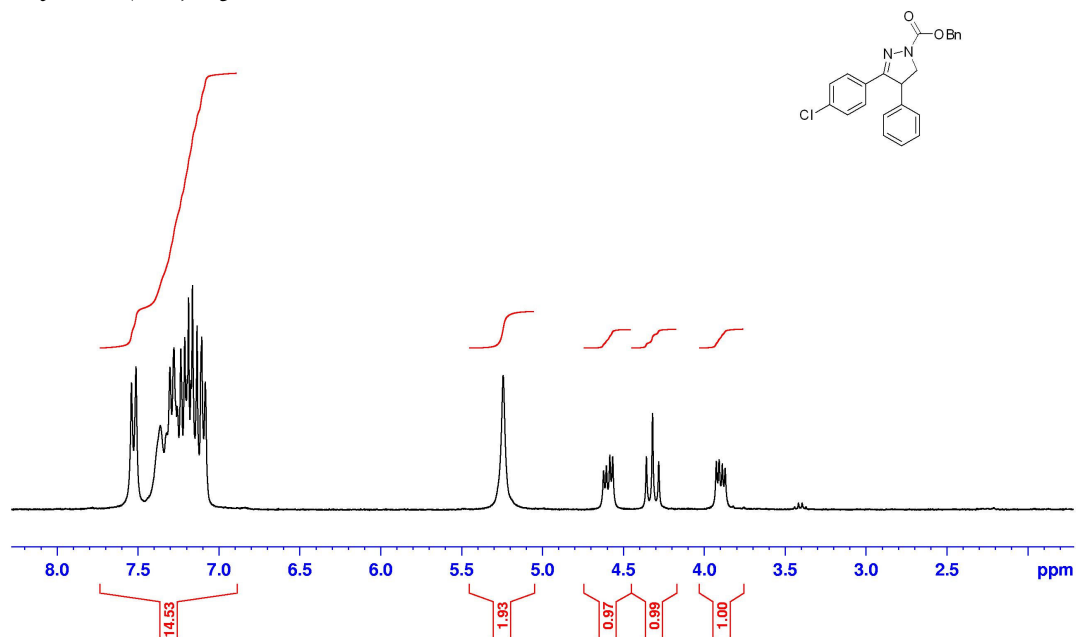

**II.10** *benzyl 3-(4-chlorophenyl)-4-phenyl-4,5-dihydro-1H-pyrazole-1-carboxylate (JMOD) 4j*

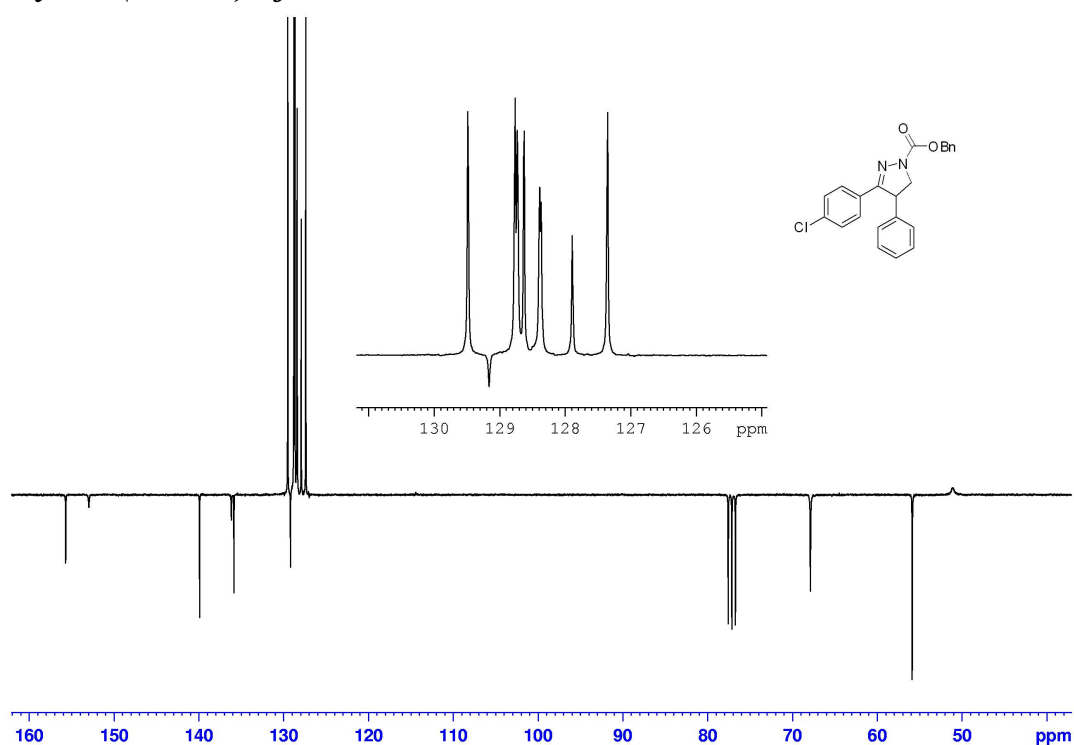

Remark: the peak corresponding to carbon 3 (CH) appeared as a small broad signal due to relaxation issue in pyrazoline-NCbz series.

**II.11 1-(3-(4-fluorophenyl)-4-phenyl-4,5-dihydro-1H-pyrazol-1-yl)ethanone (1H) 4k**

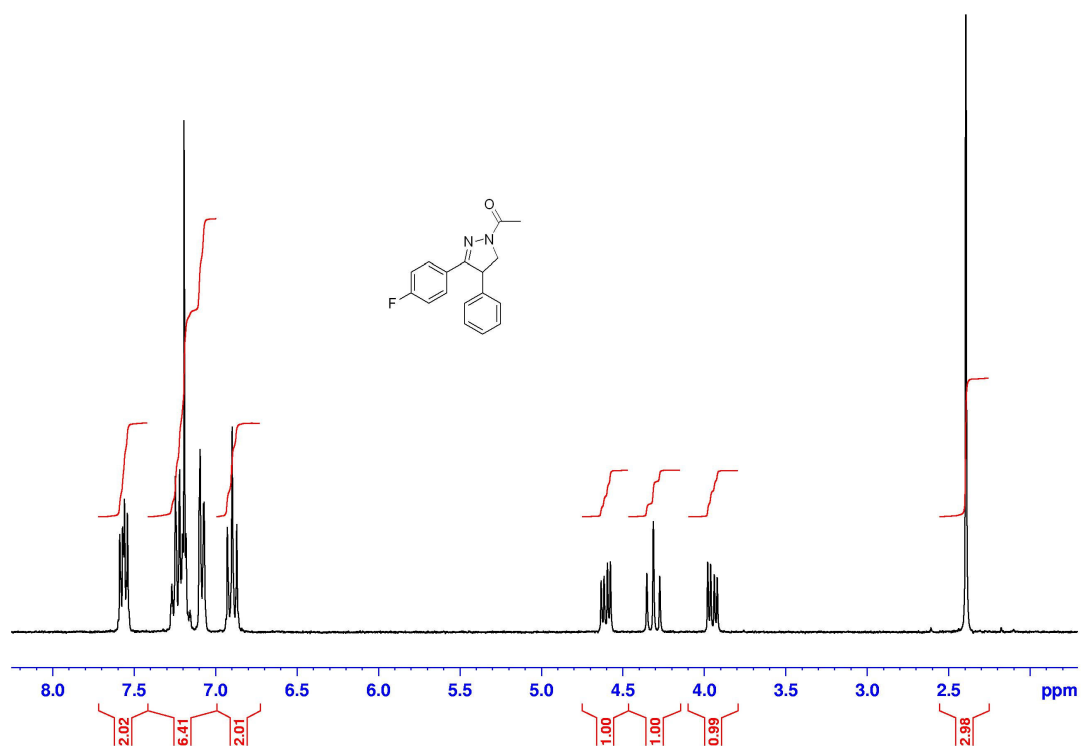

**II.11 VI.11 1-(3-(4-fluorophenyl)-4-phenyl-4,5-dihydro-1H-pyrazol-1-yl)ethanone (JM0D) 4k**

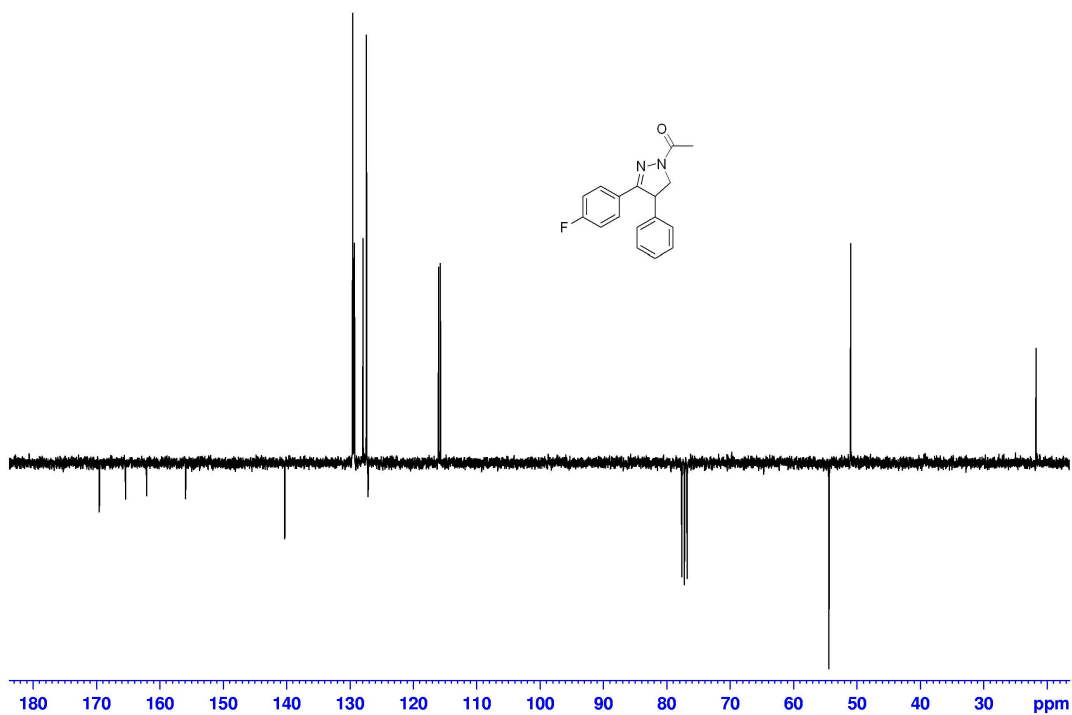

**II.12** *benzyl 3-(4-fluorophenyl)-4-phenyl-4,5-dihydro-1H-pyrazole-1-carboxylate (1H) 4l*

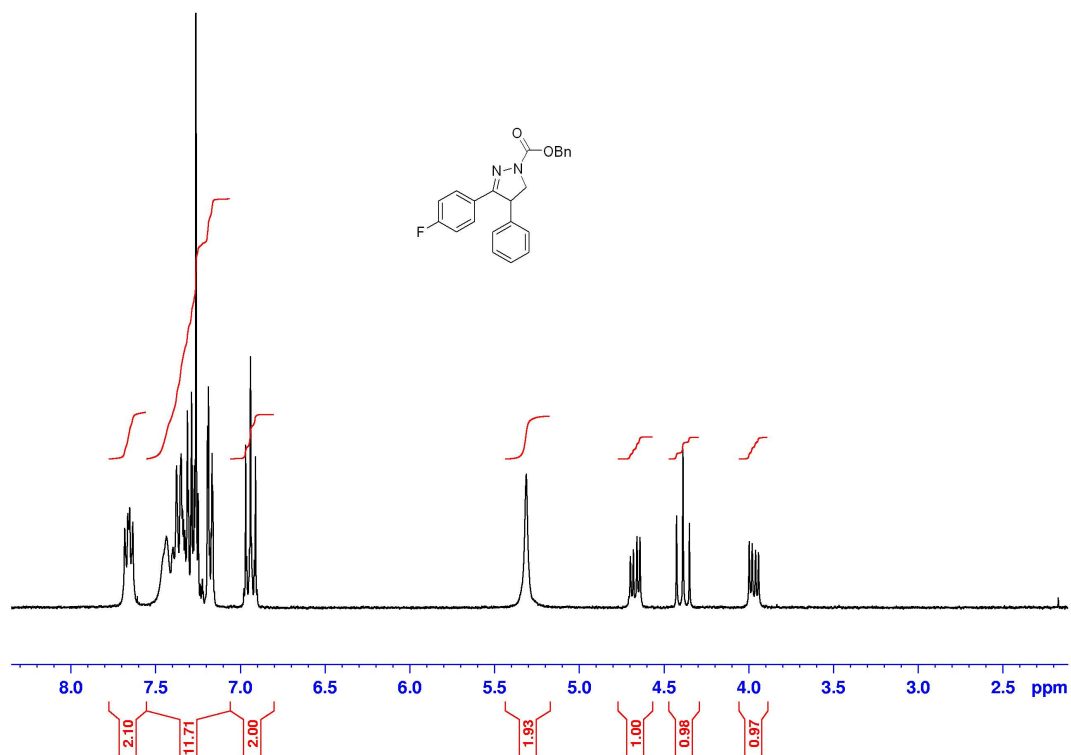

**II.12** *benzyl 3-(4-fluorophenyl)-4-phenyl-4,5-dihydro-1H-pyrazole-1-carboxylate (13C) 4l*

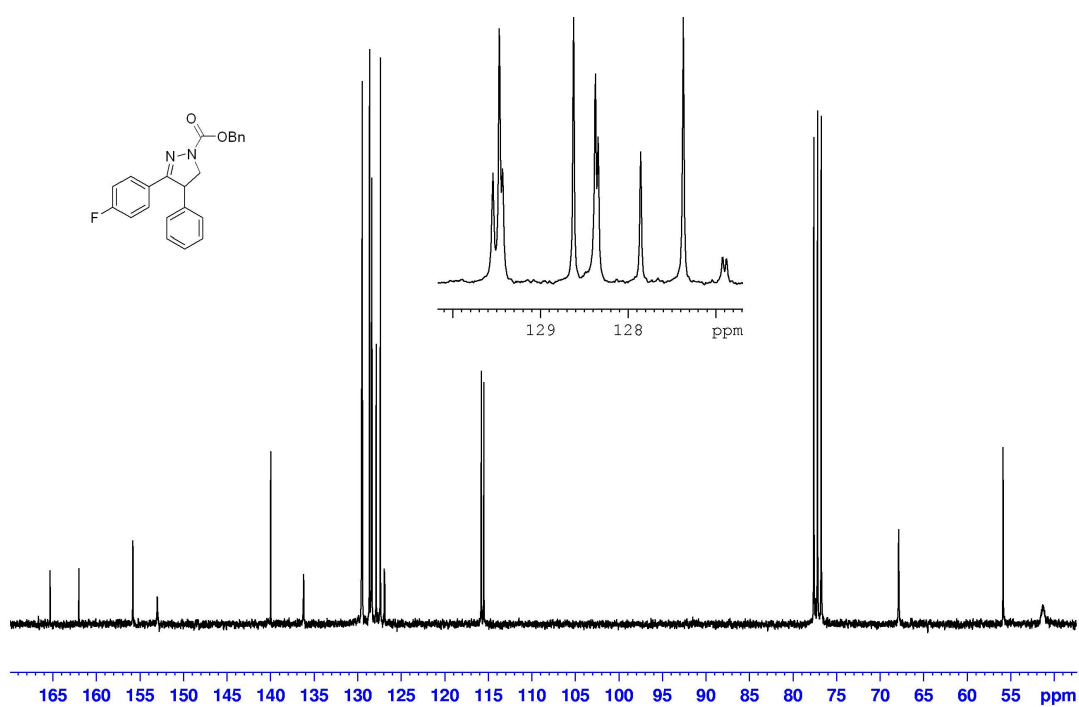

Remark: the peak corresponding to carbon 3 (CH) appeared as a small broad signal due to relaxation issue in pyrazoline-NCbz series.

**II.12** *benzyl 3-(4-fluorophenyl)-4-phenyl-4,5-dihydro-1H-pyrazole-1-carboxylate (JMOD) 4l*

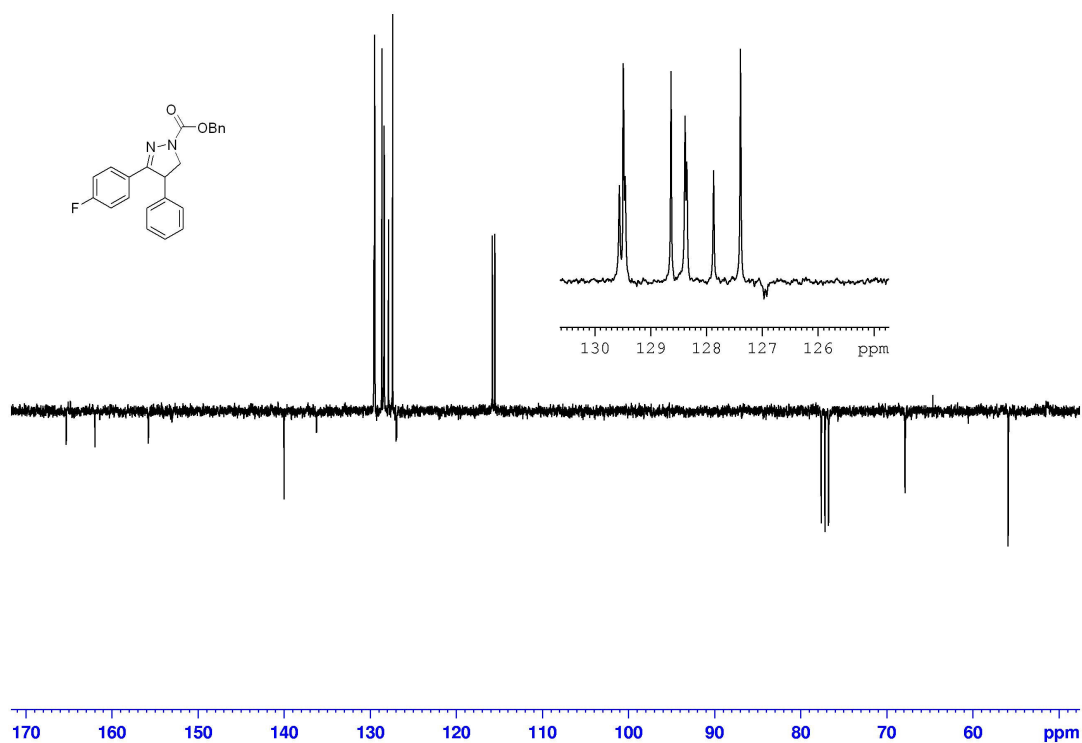

**II.13 1-(3,4-bis(4-methoxyphenyl)-4,5-dihydro-1H-pyrazol-1-yl)ethanone (1H)  
4m**

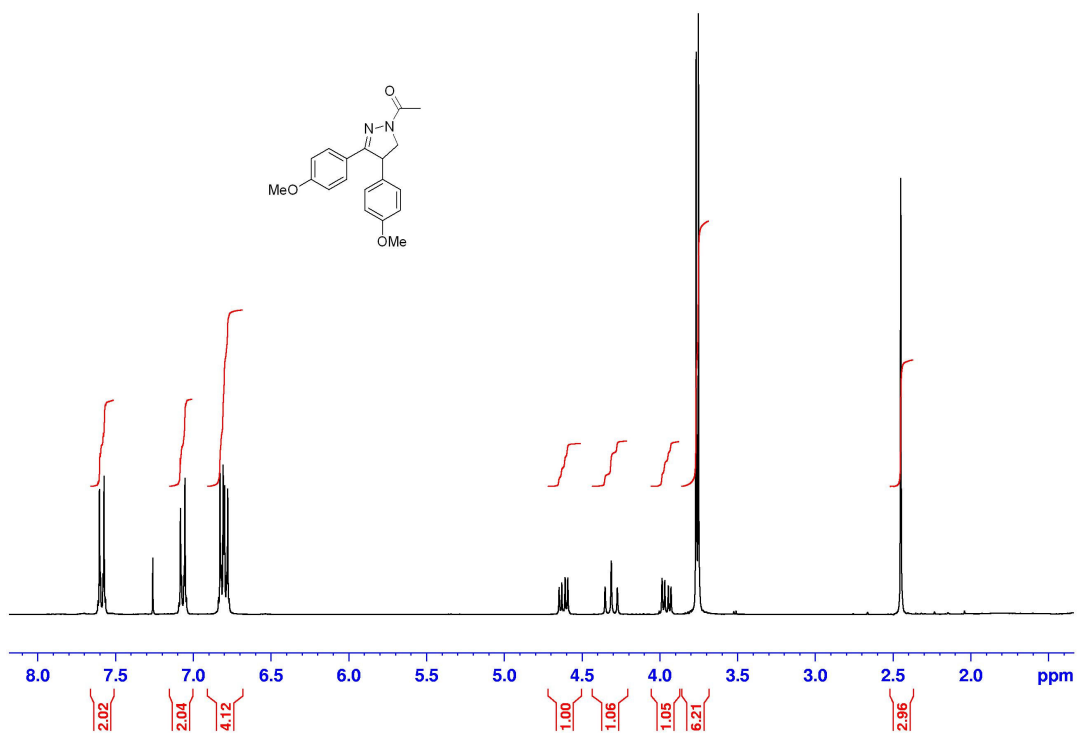

**II.13 1-(3,4-bis(4-methoxyphenyl)-4,5-dihydro-1H-pyrazol-1-yl)ethanone  
(JMOD) 4m**

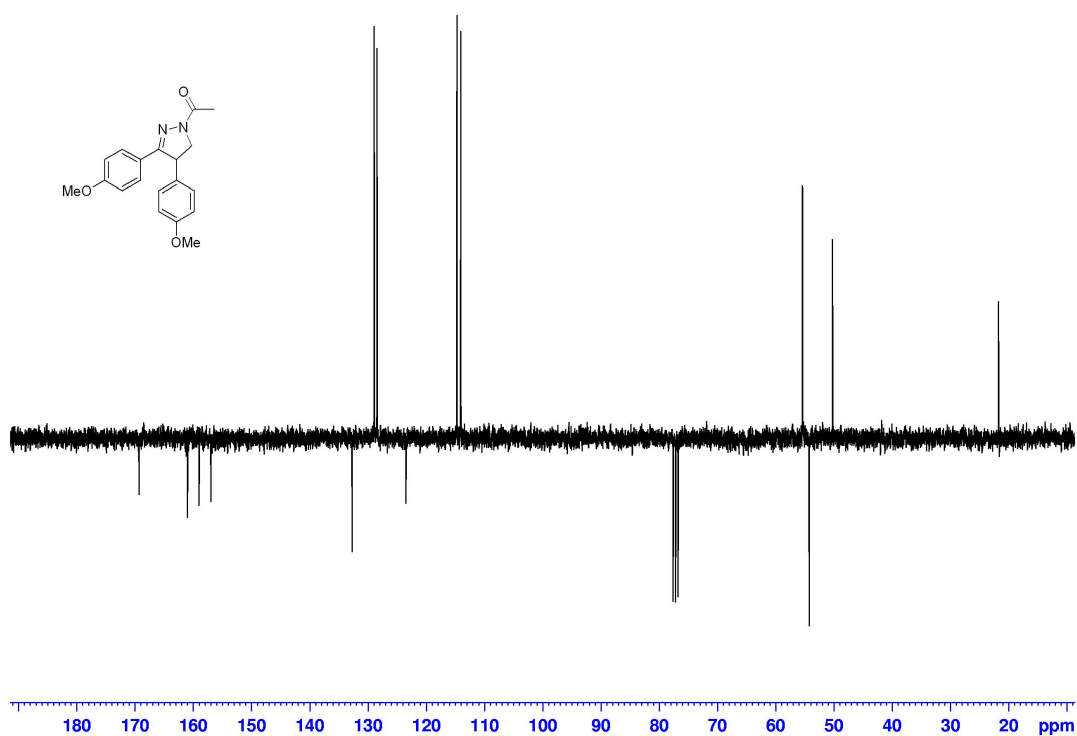



**II.14** *1-(4-phenyl-3-(thiophen-2-yl)-4,5-dihydro-1H-pyrazol-1-yl)ethanone (1H) 4n*

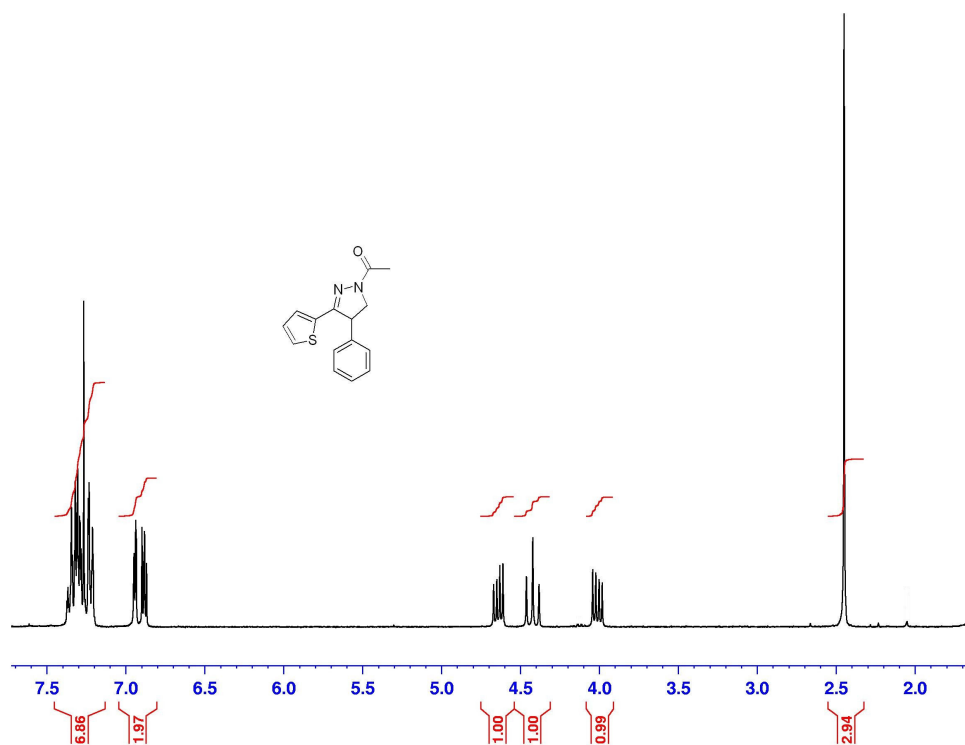

**II.14** *1-(4-phenyl-3-(thiophen-2-yl)-4,5-dihydro-1H-pyrazol-1-yl)ethanone (JMOD) 4n*

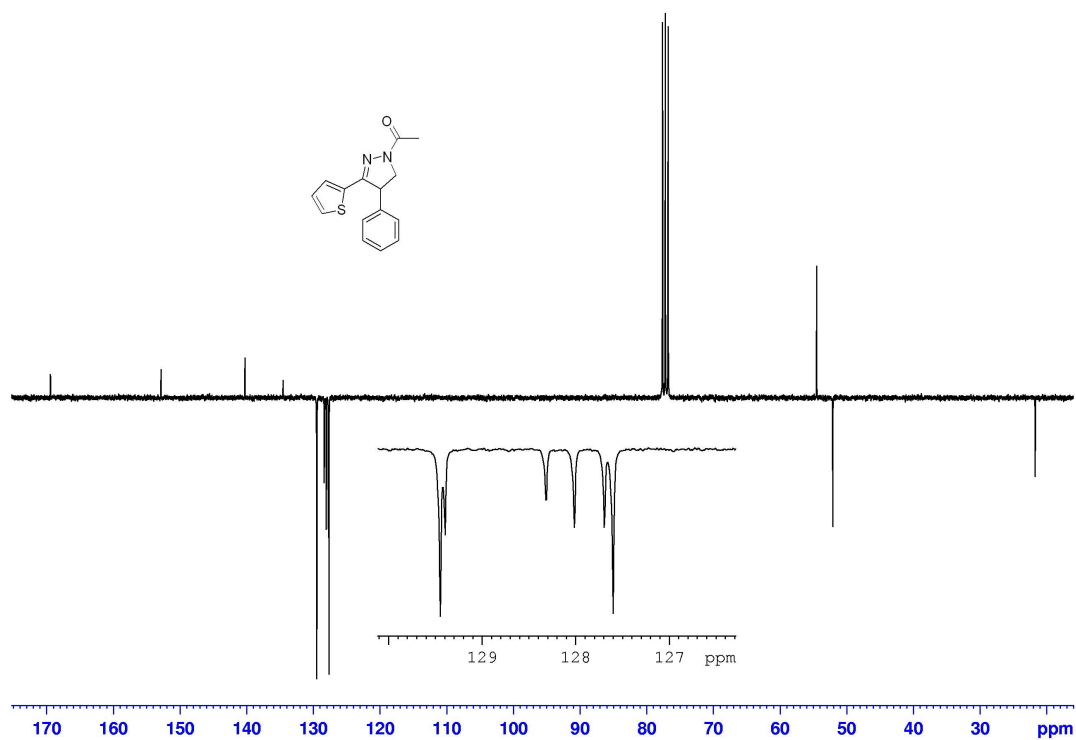

**II.15 *N*,4-diphenyl-3-(thiophen-2-yl)-4,5-dihydro-1H-pyrazole-1-carboxamide (1H) 4o**

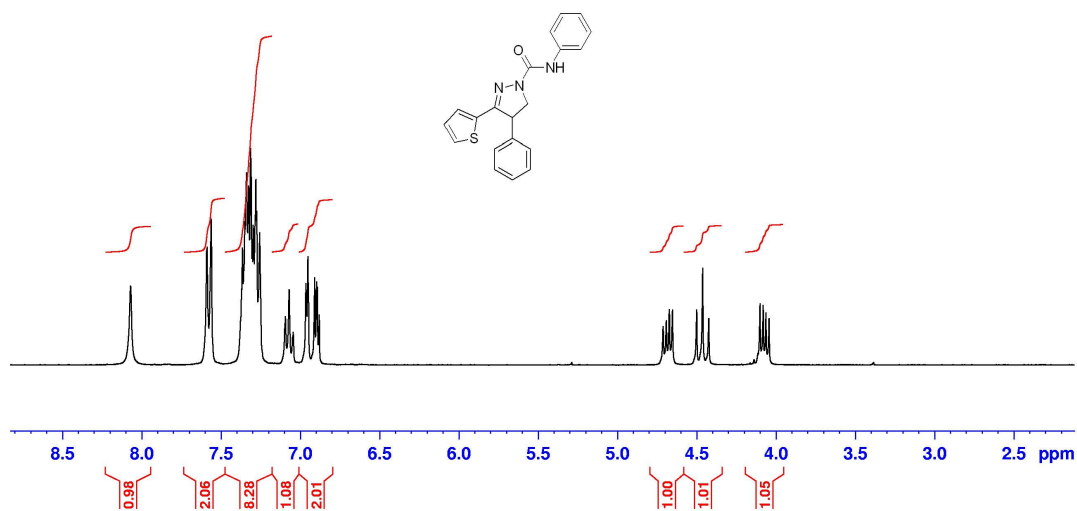

**II.15 *N*,4-diphenyl-3-(thiophen-2-yl)-4,5-dihydro-1H-pyrazole-1-carboxamide (JMOD) 4o**

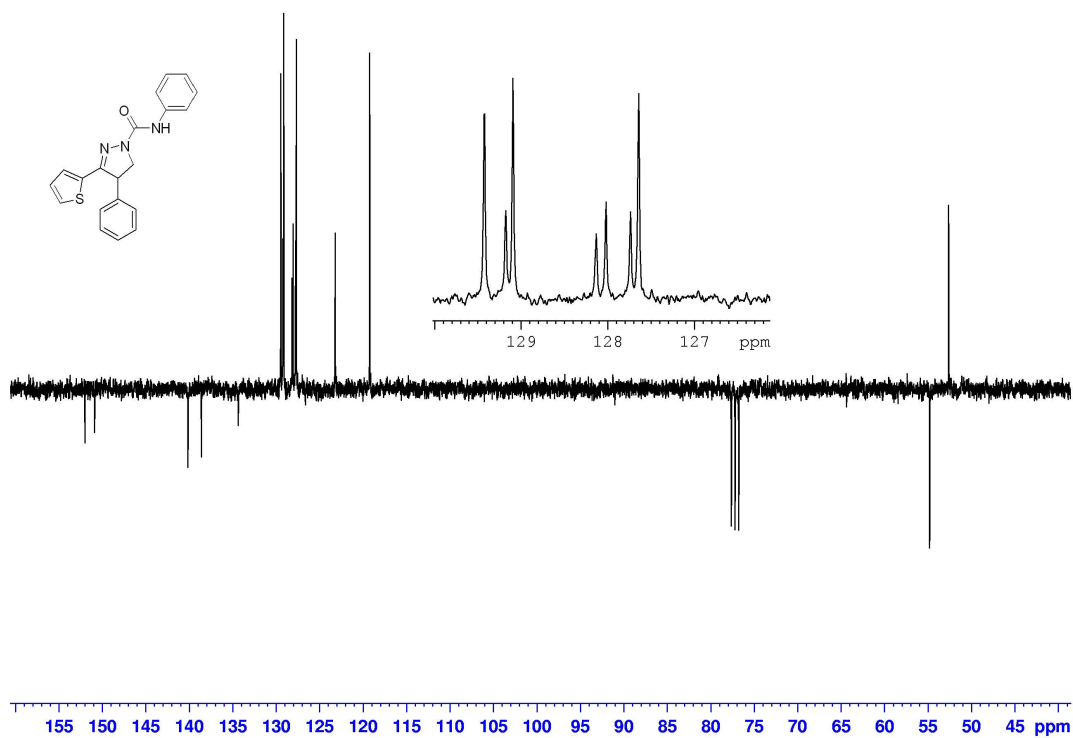

**II.16 1-(4-methyl-3-phenyl-4,5-dihydro-1H-pyrazol-1-yl)ethanone (1H) 4p**

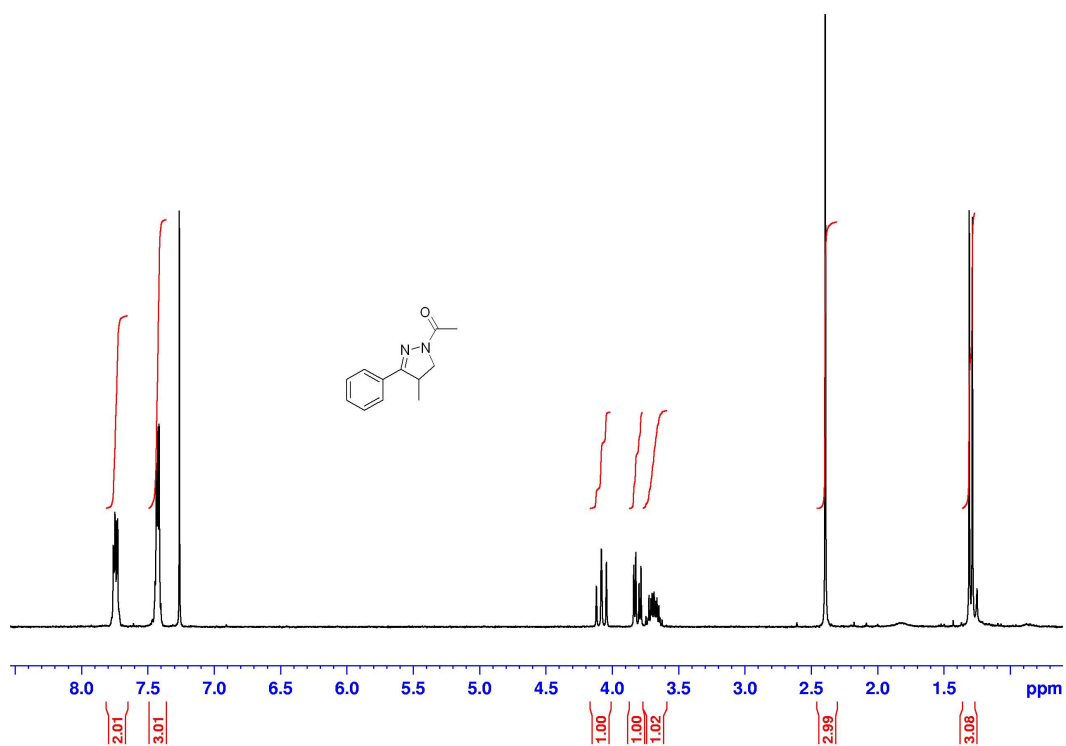

**II.16 1-(4-methyl-3-phenyl-4,5-dihydro-1H-pyrazol-1-yl)ethanone (JMOD) 4p**

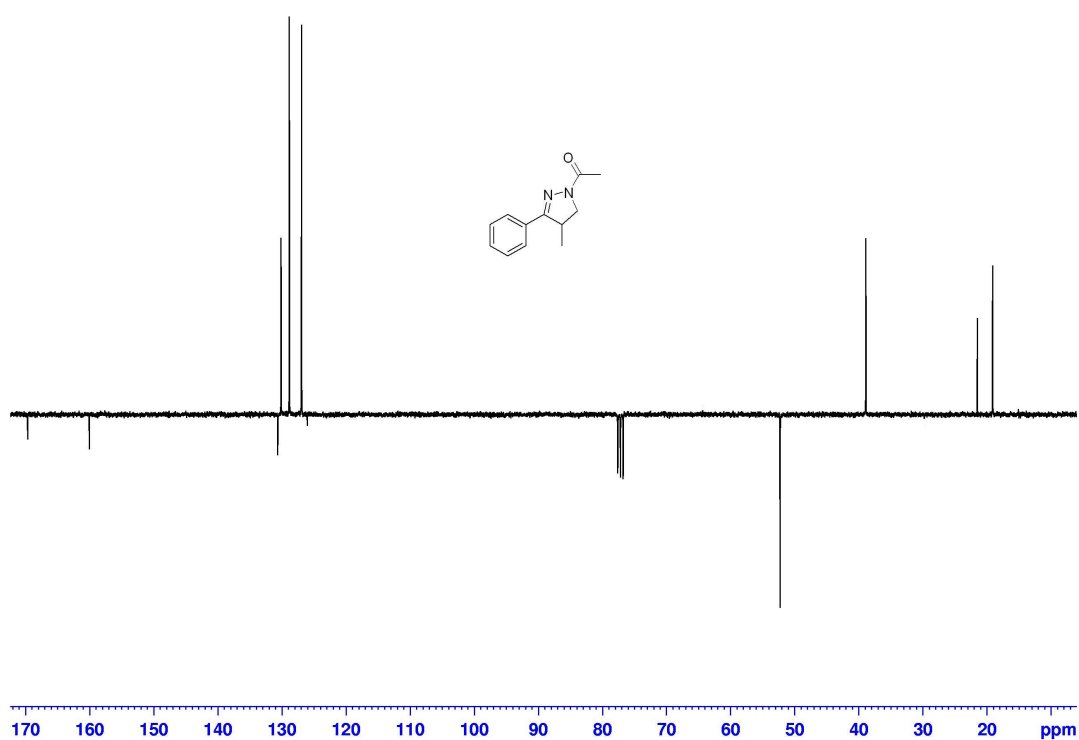

**II.17 (3-isopropyl-4-phenyl-4,5-dihydro-1H-pyrazol-1-yl)(phenyl)methanone (1H) 4q**

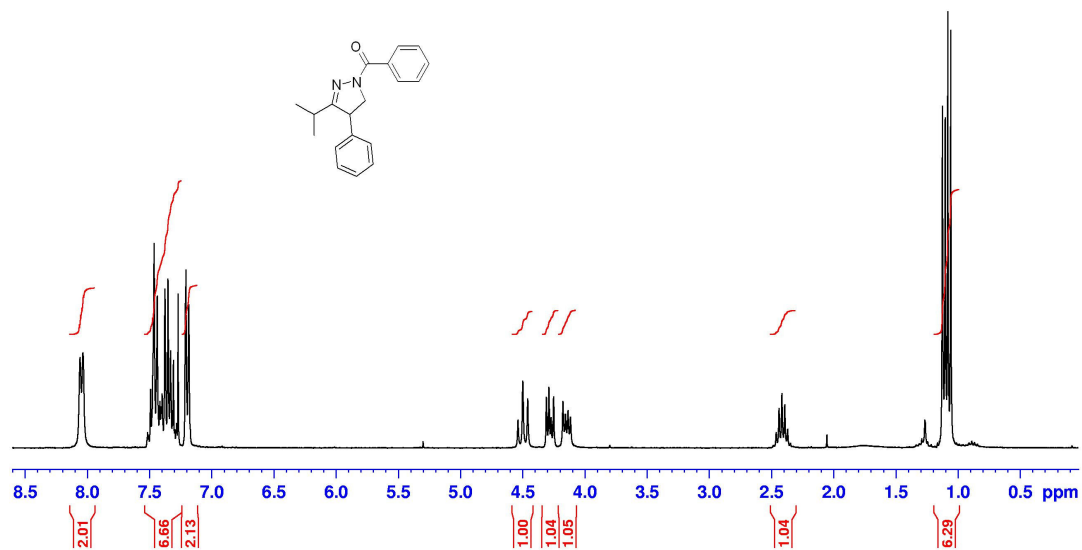

**II.17 (3-isopropyl-4-phenyl-4,5-dihydro-1H-pyrazol-1-yl)(phenyl)methanone (JMOD) 4q**

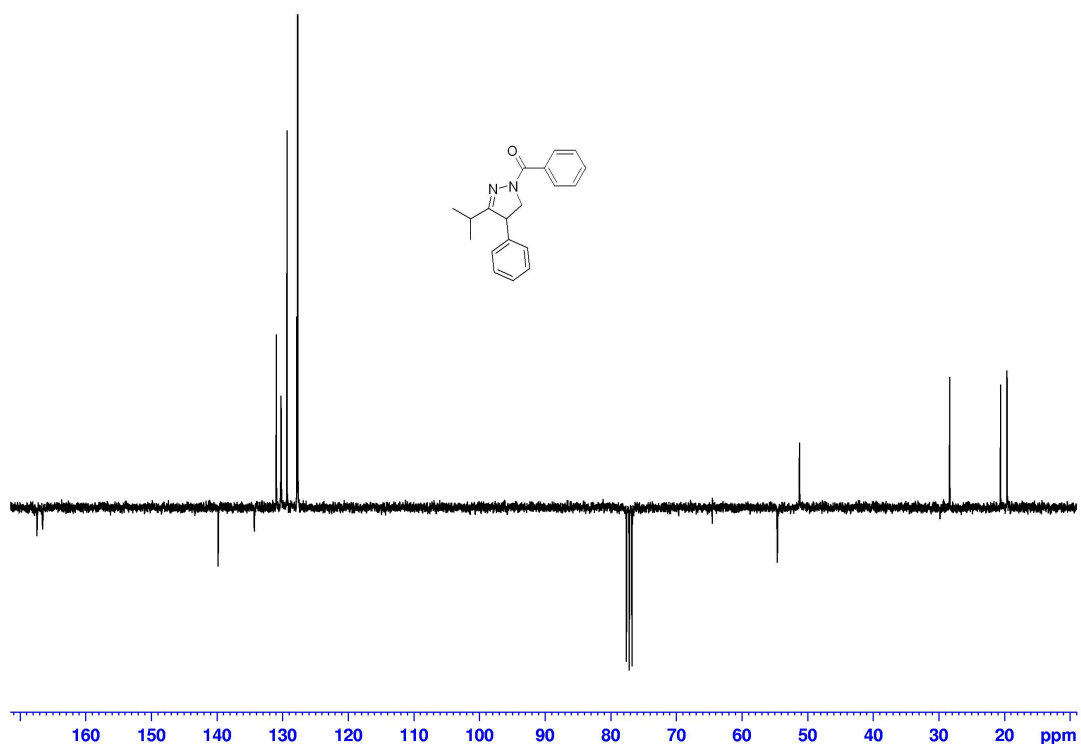

**II.18 3-isopropyl-N,4-diphenyl-4,5-dihydro-1H-pyrazole-1-carboxamide (1H)  
4r**

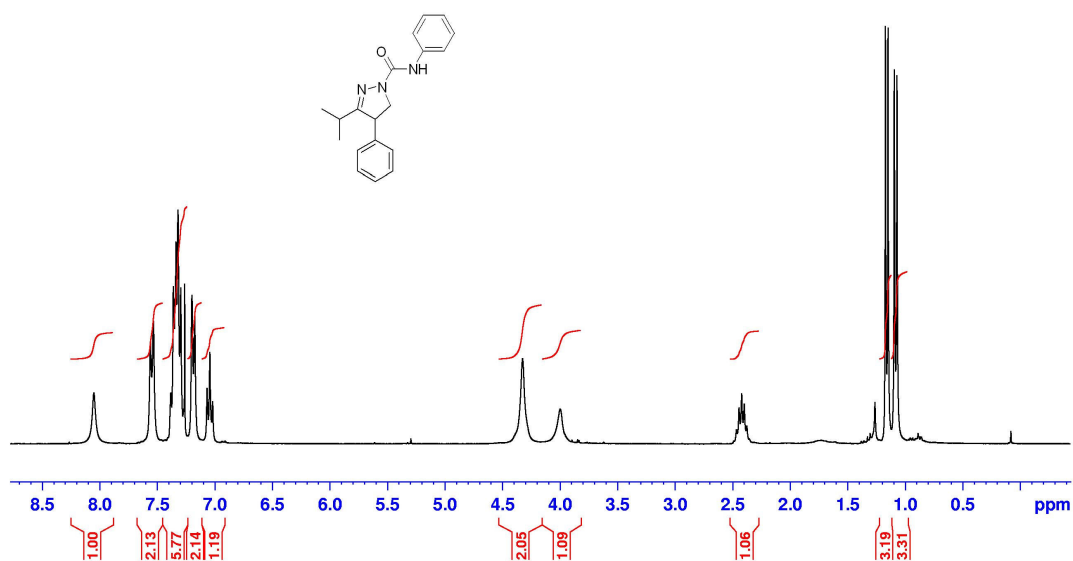

**II.18 3-isopropyl-N,4-diphenyl-4,5-dihydro-1H-pyrazole-1-carboxamide  
(JMOD) 4r**

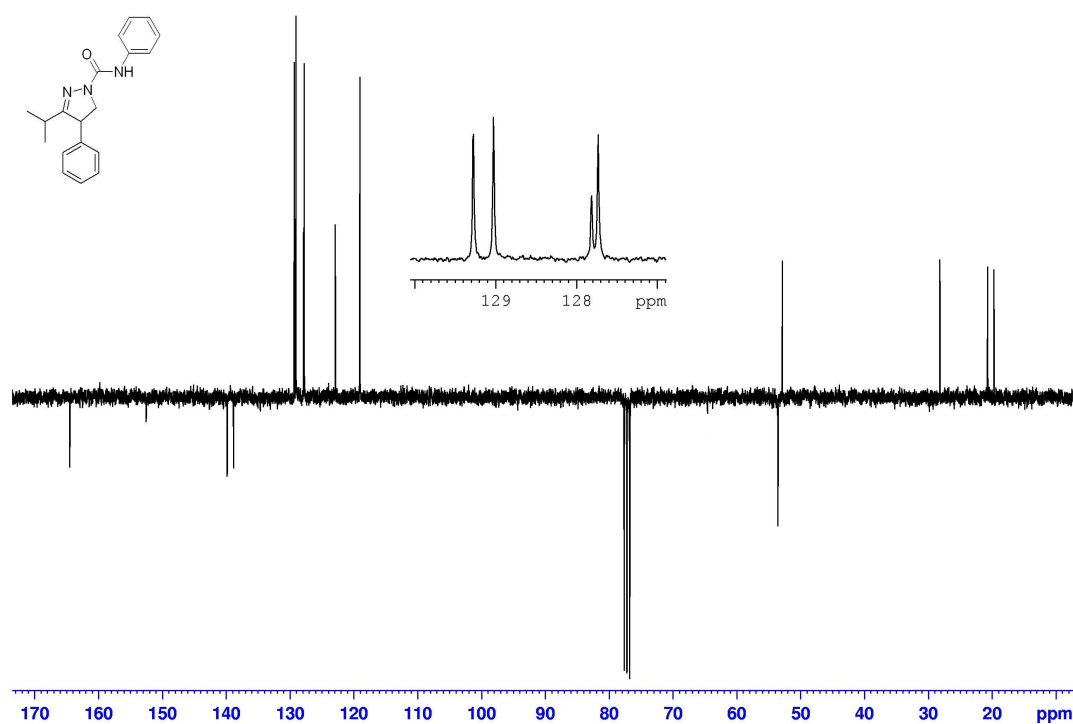

**II.19 1-(methylsulfonyl)-3,4-diphenyl-4,5-dihydro-1H-pyrazole (1H) 4s**

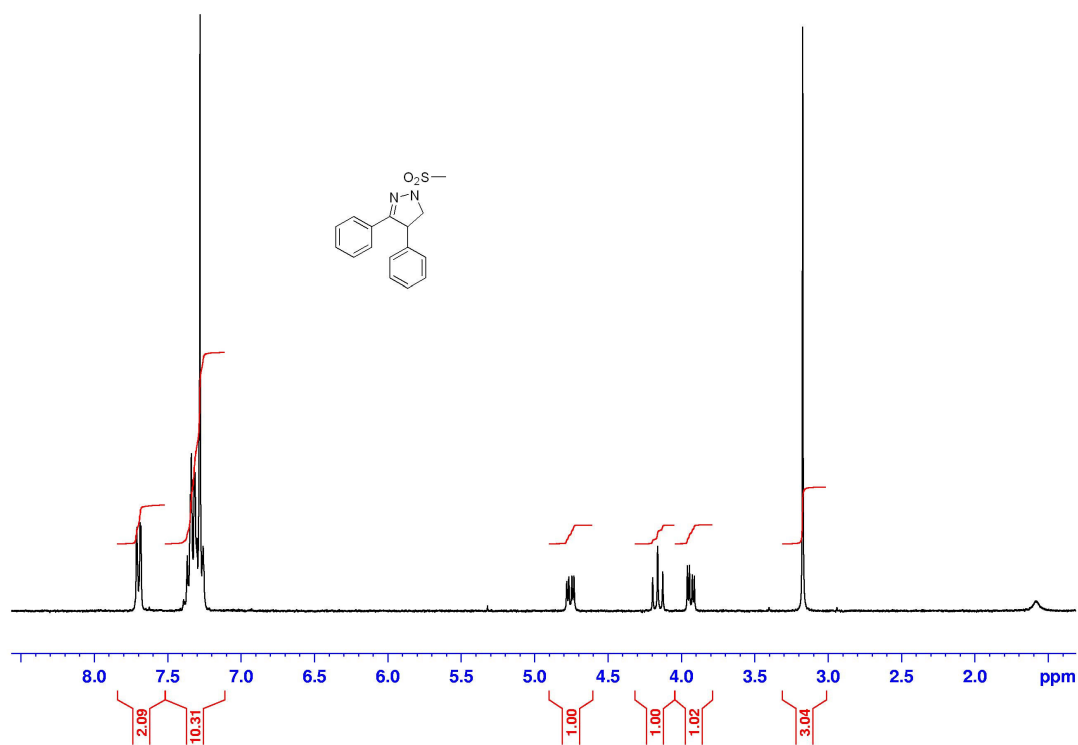

**II.19 1-(methylsulfonyl)-3,4-diphenyl-4,5-dihydro-1H-pyrazole (JMOD) 4s**

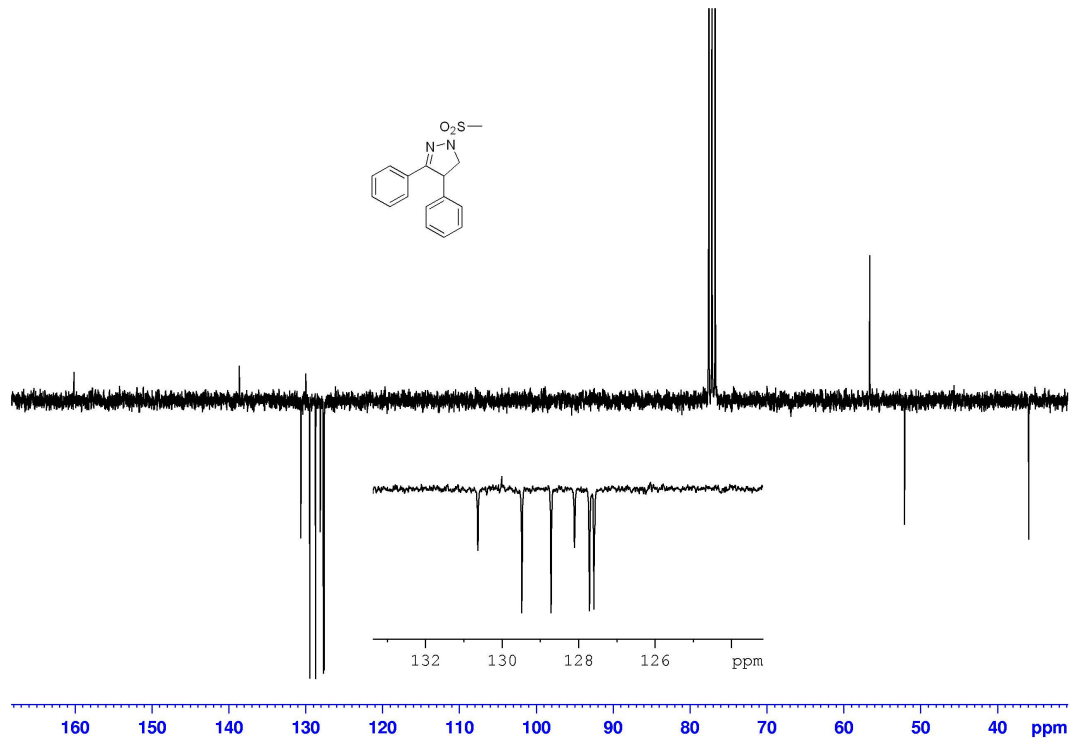

**II.20 *N*-cyclohexyl-3,4-diphenyl-4,5-dihydro-1*H*-pyrazole-1-carboxamide (1*H*)  
4*t***

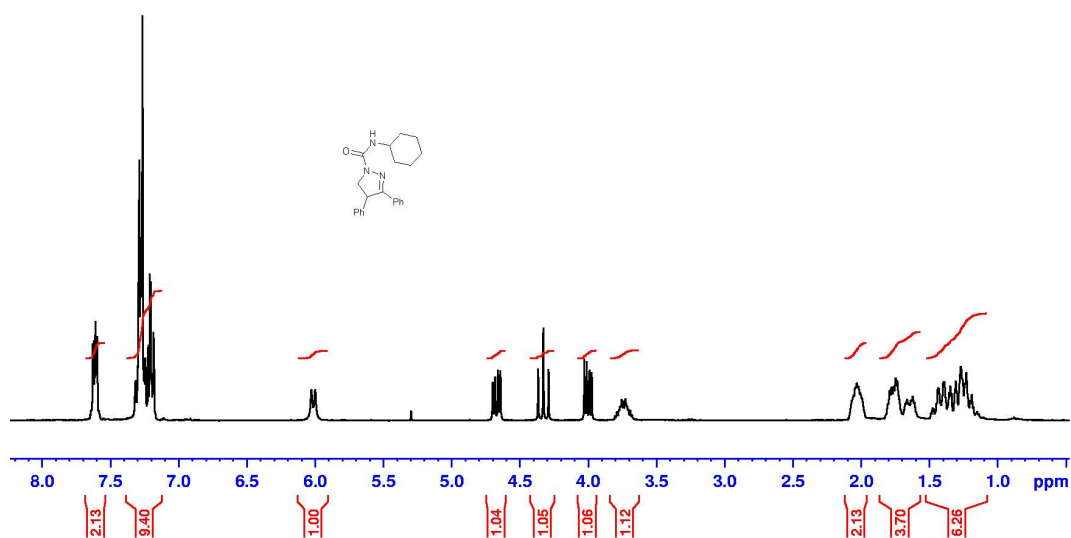

**II.20 *N*-cyclohexyl-3,4-diphenyl-4,5-dihydro-1*H*-pyrazole-1-carboxamide  
(13*C*) 4*t***

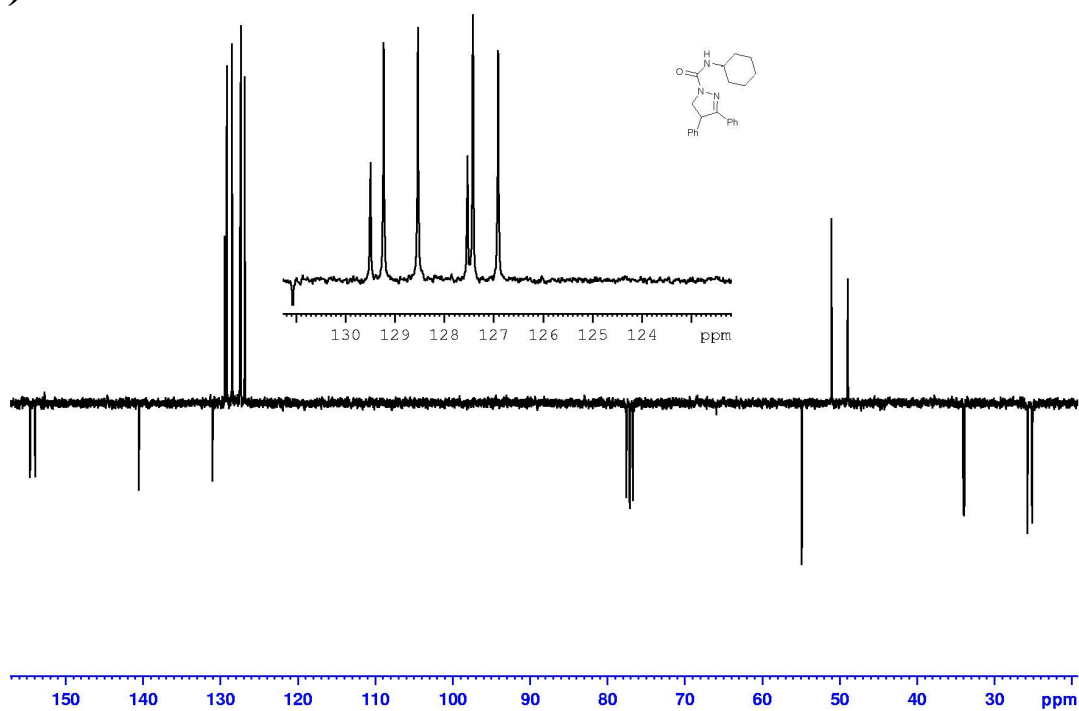

Supplement: c004704j.pdf [file c004704j.pdf]
